1 **Title:** *C. elegans* DSB-3 Reveals Conservation and Divergence among Protein Complexes

2 Promoting Meiotic Double-Strand Breaks

3

4 **Authors:** Albert W. Hinman<sup>1,2</sup>, Hsin-Yi Yeh<sup>3</sup>, Baptiste Roelens<sup>1</sup>, Kei Yamaya<sup>1</sup>, Alexander

5 Woglar<sup>1</sup>, Henri-Marc G. Bourbon<sup>4</sup>, Peter Chi<sup>3,5</sup>, Anne M. Villeneuve<sup>1,2,\*</sup>

6 <sup>1</sup>Department of Genetics, Stanford University School of Medicine, Stanford, California, USA

7 <sup>2</sup>Department of Developmental Biology, Stanford University School of Medicine, Stanford,  
8 California, USA

9 <sup>3</sup>Institute of Biochemical Sciences, National Taiwan University, Taipei, Taiwan

10 <sup>4</sup>Centre de Biologie Intégrative (CBI), Molecular, Cellular & Developmental biology unit (MCD),  
11 Université Fédérale de Toulouse, Toulouse, France

12 <sup>5</sup>Institute of Biological Chemistry, Academia Sinica, Taipei, Taiwan

13 \*Correspondence: [annev@stanford.edu](mailto:annev@stanford.edu)

14

15 **Author Contributions:**

16 AH: Designed Research, Performed Research, Analyzed Data, Wrote the Paper

17 HY: Performed Research, Analyzed Data

18 BR: Designed Research, Performed Research

19 KY: Performed Research

20 AW: Designed Research

21 HMB: Performed Research, Analyzed Data

22 PC: Designed Research, Analyzed Data

23 AV: Designed Research, Analyzed Data, Wrote the Paper

24

25 **Classification:** Major: Biological Sciences, Minor: Genetics

26

27 **Key Words:** meiosis, *C. elegans*, DNA double-strand breaks, DSB-3, meiotic recombination,

28 Mei4

29

30 **Abstract:**

31 Meiotic recombination plays dual roles in the evolution and stable inheritance of genomes:  
32 recombination promotes genetic diversity by reassorting variants, and it establishes temporary  
33 connections between pairs of homologous chromosomes that ensure for their future  
34 segregation. Meiotic recombination is initiated by generation of double-strand DNA breaks  
35 (DSBs) by the conserved topoisomerase-like protein Spo11. Despite strong conservation of  
36 Spo11 across eukaryotic kingdoms, auxiliary complexes that interact with Spo11 complexes to  
37 promote DSB formation are poorly conserved. Here, we identify DSB-3 as a DSB-promoting  
38 protein in the nematode *Caenorhabditis elegans*. Mutants lacking DSB-3 are proficient for  
39 homolog pairing and synapsis but fail to form meiotic crossovers. Lack of crossovers in *dsb-3*  
40 mutants reflects a requirement for DSB-3 in meiotic DSB formation. DSB-3 concentrates in  
41 meiotic nuclei with timing similar to DSB-1 and DSB-2 (predicted homologs of yeast/mammalian  
42 Rec114/REC114), and DSB-1, DSB-2, and DSB-3 are interdependent for this localization.  
43 Bioinformatics analysis and interactions among the DSB proteins support the identity of DSB-3  
44 as a homolog of MEI4 in conserved DSB-promoting complexes. This identification is reinforced  
45 by colocalization of pairwise combinations of DSB-1, DSB-2, and DSB-3 foci in structured  
46 illumination microscopy images of spread nuclei. However, unlike yeast Rec114, DSB-1 can  
47 interact directly with SPO-11, and in contrast to mouse REC114 and MEI4, DSB-1, DSB-2 and  
48 DSB-3 are not concentrated predominantly at meiotic chromosome axes. We speculate that  
49 variations in the meiotic program that have co-evolved with distinct reproductive strategies in  
50 diverse organisms may contribute to and/or enable diversification of essential components of  
51 the meiotic machinery.

52

53

54

55 **Significance Statement**

56 Faithful inheritance of chromosomes during meiosis depends on the formation and repair of  
57 double-strand DNA breaks (DSBs), which are generated through the activity of a  
58 topoisomerase-like protein known as Spo11. Spo11 exhibits strong conservation throughout  
59 eukaryotes, presumably reflecting constraints imposed by its biochemical activity, but auxiliary  
60 proteins that collaborate with Spo11 to promote and regulate DSB formation are less well  
61 conserved. Here we investigate a cohort of proteins comprising a complex required for meiotic  
62 DSB formation in *Caenorhabditis elegans*, providing evidence for both conservation with and  
63 divergence from homologous complexes in other organisms. This work highlights the  
64 evolutionary malleability of protein complexes that serve essential, yet auxiliary, roles in  
65 fundamental biological processes that are central to reproduction.

66

67 **Main Text**

68 **Introduction**

69 Meiotic recombination is important for two reasons. It promotes genetic diversity by  
70 reassorting traits, and it is important for creating temporary attachments between pairs of  
71 homologous chromosomes that are necessary for their future segregation at the meiosis I  
72 division. Recombination is initiated by the programmed introduction of DNA double-strand  
73 breaks (DSBs) (1). Some DSBs are repaired by a mechanism that leads to the formation of  
74 crossovers (COs) between homolog pairs, and the remaining DSBs are repaired as  
75 noncrossover products, thereby restoring genome integrity. Although DSBs are required for CO  
76 formation, they may lead to genomic instability if they are not repaired or are repaired  
77 erroneously. Thus, DSB formation in meiotic cells is governed by regulatory and surveillance  
78 mechanisms that function to ensure that enough DSBs are created to guarantee a CO on each  
79 homolog pair while limiting excess DSBs that may endanger the genome (2). Without  
80 appropriate DSB formation and repair, COs may fail to form between homologs during meiotic  
81 prophase, resulting in unattached homologs (univalents) that mis-segregate during the meiotic  
82 divisions, leading to aneuploidy in the resulting progeny.

83 Meiotic DSB formation is catalyzed by Spo11, a topoisomerase-like protein homologous to  
84 the catalytic A subunit of archaeal class VI topoisomerases that is well conserved across  
85 eukaryotic kingdoms (3–6). The mechanism of DNA breakage involves formation of a covalent  
86 linkage between Spo11 protein DNA, analogous to a key intermediate in the topoisomerase  
87 reaction (1). Despite identification of structural and mechanistic conservation between Spo11  
88 and TopVIA more than 20 years ago, however, counterparts of the archaeal TopVIB subunit that  
89 partner with Spo11 in “Spo11 core complexes” were not recognized until much later, reflecting  
90 substantial divergence both from TopVIB and among their eukaryotic orthologs (7–9).

91 DSB formation also depends on multiple additional factors that play critical roles in  
92 determining the location, timing, levels, and regulation of DSB formation (2). Several of these  
93 auxiliary DSB-promoting factors, including Rec114, Mei4 and Mer2, were originally discovered  
94 through genetic screens in *Saccharomyces cerevisiae* designed to identify genes required for  
95 initiation of recombination (10, 11). In contrast to the high level of conservation observed for  
96 Spo11, but similar to the other subunits of the Spo11 core complex, many auxiliary DSB protein  
97 such Rec114, Mei4 and Mer2 are poorly conserved at the primary sequence level (1). Indeed,  
98 high levels of sequence divergence had prevented identification of Rec114, Mei4 and Mer2  
99 homologs outside of budding yeast until non-standard bioinformatics approaches were applied  
100 (12, 13). Homologs of Rec114 and Mei4 that are required for meiotic recombination have now  
101 been identified in several species, including *Mus musculus* (13–15), *Schizosaccharomyces*  
102 *pombe* (11, 16, 17), and *Arabidopsis thaliana* (18, 19). Proteins that were independently  
103 discovered based on roles in meiotic recombination in the ascomycete *Sordaria macrospora*  
104 (*Asy1*) and in the nematode *Caenorhabditis elegans* (*DSB-1* and *DSB-2*) were also  
105 subsequently identified as putative Rec114 homologs (12, 20, 21), but Mei4 homologs were not  
106 yet identified in these organisms.

107 Several studies have established that DSB auxiliary factors Rec114 and Mei4 work  
108 closely together with each other and with Mer2 to promote meiotic DSB formation. Physical  
109 interactions among these proteins and their orthologs have been demonstrated for several  
110 organisms (13, 22–26), and coimmunoprecipitation experiments in *M. musculus* have further  
111 confirmed that these proteins interact with one another *in vivo* in a meiotic context (15). Recent  
112 biochemical analyses have shown that Rec114 and Mei4 together form individual complexes  
113 with a stoichiometry of 2 Rec114 molecules for every 1 Mei4 molecule and have further  
114 suggested that these complexes may self-assemble into large molecular condensates on  
115 chromatin during meiotic progression (27). In both *S. cerevisiae* and *M. musculus*, all three  
116 proteins have been reported to localize together in foci on meiotic prophase chromosomes (15,

117 22, 23, 26). Further, mouse REC114 and MEI4 and the Mer2 homolog IHO1 all localize  
118 predominantly at the meiotic chromosome axis (15, 26), contributing to the idea that they act as  
119 an intermediary between chromosome organization and DSB formation. Consistent with this  
120 view, chromatin immunoprecipitation experiments in both *S. cerevisiae* and *S. pombe* have  
121 shown that these proteins interact with both axis-enriched DNA sequences and with DSB sites  
122 (25, 28–30). Additionally, *S. cerevisiae* Rec114 and Mei4 have been found to interact with the  
123 Rec102 and Rec104 subunits that together comprise the TopVIB-like component of the Spo11  
124 core complex (9, 23). Together these findings implicate Rec114-Mei4 in recruiting Spo11 to the  
125 meiotic chromosome axis.

126 *C. elegans* DSB-1 and DSB-2, while clearly implicated in meiotic DSB formation, were  
127 difficult to recognize as Rec114 homologs owing to high sequence divergence (12, 20, 21).  
128 Further, *C. elegans* differs from yeast and mice regarding the relationships between DSB  
129 formation and meiotic chromosome organization. Whereas DSB-dependent recombination  
130 intermediates are required to trigger assembly of the synaptonemal complex (SC) between  
131 homologous chromosomes in yeast and mice, *C. elegans* can achieve full synapsis between  
132 aligned homologs even in the absence of DSB formation (6). Thus, there are substantial  
133 differences in the cellular environments in which DSB-promoting complexes have evolved and  
134 function in different organisms.

135 In our current work, we identify DSB-3 as a protein that partners with DSB-1 and DSB-2  
136 to promote SPO-11-dependent meiotic DSB formation in *C. elegans*. We demonstrate a  
137 requirement for DSB-3 in promoting the DSBs needed for CO formation, and we show that  
138 DSB-3 becomes concentrated in germ cell nuclei during the time when DSBs are formed, in a  
139 manner that is interdependent with DSB-1 and DSB-2. Through a combination of bioinformatics,  
140 interaction data, and colocalization analyses, we identify DSB-3 as a likely Mei4 homolog and  
141 establish DSB-1-DSB-2-DSB-3 as functional counterpart of the Rec114-Mei4 complex. Despite  
142 homology and a shared role in promoting DSB formation, we uncover surprising differences

143 between the *C. elegans* DSB-1-DSB-2-DSB-3 and the REC114-MEI4 complexes observed in  
144 mice, notably that *C. elegans* DSB-1, DSB-2 and DSB-3 are distributed broadly on chromatin  
145 rather than becoming concentrated preferentially on chromosome axes. This work highlights the  
146 evolutionary malleability of protein complexes that serve essential, yet auxiliary, roles in meiotic  
147 recombination. Rapid diversification of such proteins may reflect a relaxation of constraints  
148 enabled by changes in another aspect of the reproductive program, or alternatively, they may  
149 reflect a capacity of alterations in such proteins to have an immediate impact on reproductive  
150 success.

151

## 152 **Results**

### 153 **Identification of *dsb-3* as a gene required for the formation of meiotic crossovers**

154 The *dsb-3(me6ts)* allele was isolated in a genetic screen for mutants exhibiting a high  
155 incidence of males among the progeny of self-fertilizing hermaphrodites, *i.e.*, the “Him”  
156 phenotype, which is indicative of errors in segregation of X chromosomes during meiosis. *me6ts*  
157 mutant hermaphrodites exhibit temperature-sensitive meiotic defects affecting both autosomes  
158 and X chromosomes (Table 1, Figure 1A). Whereas inviable embryos and males (XO) are rare  
159 among the self-progeny of wild-type hermaphrodites (XX), *dsb-3(me6ts)* mutant hermaphrodites  
160 raised at the non-permissive temperature of 25°C produce 28% inviable embryos, and 17% of  
161 their surviving progeny are males. Further, DAPI staining of chromosomes in oocytes at  
162 diakinesis, the last stage of meiotic prophase, revealed a defect in chiasma formation in the  
163 *dsb-3(me6ts)* mutant, reflecting an underlying defect in crossover formation (see below).  
164 Whereas wild-type oocyte nuclei consistently exhibit 6 pairs of homologous chromosomes  
165 connected by chiasmata (bivalents), oocyte nuclei in the *dsb-3(me6ts)* mutant exhibited a



166 mixture of bivalents and unattached (achiasmate) chromosomes (univalents), with the incidence  
167 of univalents increasing with time.

168 Mapping and sequencing identified a missense mutation at genomic position IV:  
169 7758710 (WS279) as the likely causal mutation responsible for the *dsb-3(me6ts)* mutant  
170 phenotype (see Materials and Methods); this mutation results in a Leu165Phe substitution in the  
171 previously uncharacterized protein C46A5.5. CRISPR/Cas9 genome editing was used to  
172 introduce multiple stop codons early into the first exon of C46A5.5, thereby creating the null  
173 allele *me115* (Figure 1B). *me115* fails to complement *dsb-3(me6ts)* (Figure 1A), confirming the  
174 identity of C46A5.5 as *dsb-3*.

175 Analysis of the *dsb-3(me115)* null mutant indicates that the DSB-3 protein is required for  
176 the formation of meiotic crossovers between all six pairs of homologous chromosomes. *dsb-*  
177 *3(me115)* mutant hermaphrodites produced 99% inviable embryos, and 25% of their surviving  
178 progeny were male, reflecting mis-segregation of autosomes and X chromosomes (Table 1).  
179 Diakinesis oocytes of *dsb-3(me115)* mutant hermaphrodites exhibited an average of  $11.6 \pm 0.6$   
180 DAPI-stained bodies, indicating of a lack of chiasmata connecting all six homolog pairs (Figure  
181 1A). A severe defect in crossover formation in the *dsb-3(me115)* mutant was also revealed  
182 using GFP::COSA-1 as a cytological marker of crossover-designated sites in late pachytene  
183 nuclei ((31); Figure 1C). Whereas 6 GFP::COSA-1 foci (1 per homolog pair) were consistently  
184 observed in late pachytene nuclei of control worms, GFP::COSA-1 foci were absent from most  
185 late pachytene nuclei in the *dsb-3(me115)* mutant.

186 Since pairing and assembly of the synaptonemal complex between homologous  
187 chromosomes are prerequisites for the formation of crossovers during *C. elegans* meiosis, we  
188 evaluated whether these features were impaired in the *dsb-3(me115)* mutant. We assessed  
189 pairing using fluorescence *in-situ* hybridization (FISH) for a 1 Mbp segment of Chromosome II  
190 and immunostaining for HIM-8, a C2H2 zinc-finger DNA-binding protein that concentrates on the

191 Chromosome X pairing center (32, 33), demonstrating that *dsb-3(me115)* mutants are proficient  
192 for homolog pairing (Figure 1D). Further, immunostaining for the axial element protein HTP-3  
193 and the synaptonemal complex central region protein SYP-2 (34, 35) revealed fully synapsed  
194 chromosomes in early pachytene nuclei in the *dsb-3(me115)* mutant, indicating successful SC  
195 assembly (Figure 1E). Together these data indicate that the DSB-3 protein is dispensable for  
196 pairing and synapsis, and point to a role for this protein in the DNA events of recombination.

197 During *C. elegans* meiosis, failure to form crossover recombination intermediates  
198 between one or more chromosome pairs prolongs the early pachytene stage of meiotic  
199 prophase, reflecting the operation of a “crossover assurance” checkpoint (20, 21, 36).  
200 Consistent with the observed deficit of interhomolog crossovers, *dsb-3(me115)* mutant gonads  
201 display an extended zone of nuclei exhibiting phosphorylation of nuclear envelope protein SUN-  
202 1, a marker of crossover assurance checkpoint activation (Supplemental Figure 1A).

### 203 **DSB-3 is required for meiotic double-strand break formation**

204 Meiotic recombination is initiated through the formation of DSBs by the conserved  
205 topoisomerase-like protein SPO-11 (3, 6). Following formation, these DSBs are then processed  
206 to enable the loading of the DNA strand-exchange protein RAD-51 (37, 38). RAD-51 foci thus  
207 mark the sites of recombination intermediates that can be assayed as a proxy for successful  
208 initiation of meiotic recombination (35, 39). We observed a strong decrease in the number of  
209 RAD-51 foci in *dsb-3(me115)* mutants relative to wild type (Figure 2A), suggesting that fewer  
210 DSBs are being created in these mutants or that there is a failure to load RAD-51 at DSB sites.

211 To determine whether fewer endogenous DSBs was the defect responsible for the observed  
212 reduction in RAD-51 foci, we used  $\gamma$ -irradiation to introduce ectopic DSBs to test whether such  
213 breaks are sufficient to restore crossover formation. Similar approaches were taken with other  
214 DSB-defective mutants in *C. elegans*, such as *dsb-1*, *dsb-2*, and *spo-11* (6, 20, 21). Young adult

215 *dsb-3(me115)* and *dsb-3(me6ts)* hermaphrodites (alongside wild-type and *spo-11(me44)*  
216 controls) were exposed to 5000 rad of  $\gamma$ -irradiation and subsequently assayed for crossover  
217 formation through DAPI staining of chromosomes in oocyte nuclei. We observed a full rescue of  
218 normal DAPI-body counts after irradiation (Figure 2B), suggesting that the *dsb-3* mutants are  
219 specifically defective in DSB formation.

## 220 **DSB-3 is concentrated in DSB-competent nuclei and is interdependent with DSB-1 and** 221 **DSB-2**

222 Consistent with its role in promoting meiotic DSB formation, we find that DSB-3 localizes to  
223 germ cell nuclei during the time when meiotic DSBs are formed. To assess DSB-3 localization in  
224 the germ line, we generated a transgenic strain that expresses a DSB-3::GFP fusion protein in  
225 the germ line in the *dsb-3(me15)* null mutant background (*meSi7[sun-1p::dsb-*  
226 *3::gfp::sun13'UTR]* II; *dsb-3(me115)* IV); based on assessment of progeny viability and DAPI  
227 bodies in diakinesis oocytes, we infer that this DSB-3::GFP fusion protein is largely functional in  
228 promoting meiotic recombination (Table 1). Immunolocalization experiments in whole-mount  
229 dissected gonads show that DSB-3::GFP becomes concentrated in germ cell nuclei within the  
230 transition zone, soon after entry into meiotic prophase (Figure 3A). The DSB-3::GFP  
231 immunofluorescence signal is strongest in early pachytene nuclei, then declines sharply in mid-  
232 pachytene, albeit with a few outlier nuclei in the late pachytene region of the gonad retaining a  
233 strong DSB-3 signal. This pattern of appearance and disappearance of DSB-3 from germ cell  
234 nuclei is similar to the patterns observed for the double-strand break promoting proteins DSB-1  
235 and DSB-2 ((20, 21) and Figure 3A), and corresponds to the timing when nuclei are competent  
236 for meiotic DSB formation.

237 The DSB-3, DSB-2, and DSB-1 proteins are not only abundant in the same nuclei during  
238 early meiotic prophase, but they are also interdependent for this immunolocalization. Previous  
239 studies had demonstrated interdependence for DSB-1 and DSB-2 (20, 21), with loss of the

240 DSB-2 immunofluorescence signal in a *dsb-1* null mutant (which lacks meiotic DSB-promoting  
241 activity) and reduction of DSB-1 immunofluorescence signal in a *dsb-2* null mutant (which  
242 retains a low residual level of DSB-promoting activity). Similarly, we found that DSB-3::GFP  
243 immunofluorescence signal was abolished in *dsb-1* null mutant germ lines (Figure 3B).  
244 Likewise, DSB-3::GFP immunofluorescence signal was reduced in *dsb-2* null mutant germ lines  
245 and was restricted to a few rows of nuclei in the transition zone and very early pachytene  
246 regions of the gonad (Figure 3B). Conversely, DSB-1 and DSB-2 immunostaining were lost in  
247 *dsb-3(me115)* mutant germ lines (Figure 3C). Collectively, these data indicate that DSB-3, DSB-  
248 2, and DSB-1 are interdependent for proper localization to germ cell nuclei, indicating that they  
249 function together in promoting meiotic DSB formation.

250 Together, our data demonstrating 1) a similar requirement in promoting DSB formation, 2)  
251 concentration in the same nuclei, and 3) interdependence for localization and/or abundance in  
252 meiotic nuclei are all consistent with DSB-3 functioning in a protein complex together with DSB-  
253 1 and DSB-2 to promote the formation of SPO-11-dependent meiotic DSBs.

#### 254 **Evidence that DSB-1, DSB-2 and DSB-3 form a complex homologous to the yeast and** 255 **mammalian Rec114-Mei4 complexes**

256 Although the initial PSI-BLAST searches conducted for DSB-1 and DSB-2 had not  
257 identified homologs outside of *Caenorhabditis* (20, 21), DSB-1 and DSB-2 were subsequently  
258 identified as likely distant homologs of the Rec114 meiotic DSB-promoting proteins from fungi  
259 and mammals (12). This identification was enabled using an approach involving PSI-BLAST  
260 searches initiated using sequence alignments, in combination with scanning for patterns of  
261 similarity in predicted secondary structure, to identify short signature motifs (SSMs) in poorly  
262 conserved proteins (40). We obtained additional support for the assignment of DSB-1 and DSB-  
263 2 as Rec114 homologs using the Phyre2 structure prediction server (41), which identified  
264 medium confidence (#6 hit, 40.3%) and low confidence (#19 hit, 11.9%) alignments between the

265 N-terminal domains of DSB-2 and DSB-1 and the N-terminal domain (where the identified SSMs  
266 are located) of the solved structure of mouse Rec114 (42). We therefore used an alignment  
267 driven PSI-BLAST approach similar to that described above to identify DSB-3 as a putative  
268 homolog of Mei4 (see Materials and Methods, Figure 4A, Supplemental Figure 2), which is  
269 required for meiotic DSB formation in yeast and mice and forms a complex with Rec114 (13–15,  
270 22, 24, 43). Based on local amino acid composition and relative position in the protein  
271 sequence, three of the 6 SSMs previously identified in Mei4 homologs from diverse species  
272 (SSMs #1, 4 and 6) are well supported in the *Caenorhabditis* DSB-3 orthologs, while the other  
273 three SSM are less well conserved.

274 To complement these *in silico* analyses, we used yeast two-hybrid (Y2H) assays to establish a  
275 network of interactions among the DSB-1, DSB-2, and DSB-3 proteins and SPO-11, the protein  
276 that catalyzes DSB formation (Figure 4B, Supplemental Figure 2). Y2H interactions were  
277 detected between DSB-1 and DSB-2 and between DSB-1 and DSB-3, consistent with an ability  
278 of these proteins to form complexes. Homotypic interactions were also detected both for DSB-1  
279 and for DSB-2. In addition to the interactions detected among the putative Rec114 and Mei4  
280 homologs, DSB-1 also interacted with SPO-11 in the Y2H assay.

281 We note that a truncated version of DSB-1 lacking the N-terminal 33 amino acids loses the  
282 ability to interact with SPO-11 but retains its ability to associate with DSB-2 and DSB-3. This  
283 suggests that the interactions between DSB-1 and SPO-11 and the interactions between DSB-1  
284 and DSB-2 or DSB-3 may be mediated, at least in part, by different parts of the DSB-1 protein.

285

### 286 **DSB-3, DSB-2, and DSB-1 colocalize in meiotic nuclei**

287 To complement our genetic, bioinformatic, and Y2H evidence that DSB-3, DSB-2, and  
288 DSB-1 function together as components of conserved protein complexes to promote DSB

289 formation, we investigated their colocalization using Structured Illumination Microscopy (SIM) on  
290 spread preparations of meiotic nuclei (Figure 5). For most of these analyses, we used a  
291 moderate nuclear spreading protocol (44), coupled with SIM imaging to provide improved spatial  
292 resolution below the limits of standard light microscopy (45). This approach enabled detection of  
293 these proteins as chromosome-associated foci. To facilitate co-staining of protein pairs for these  
294 colocalization analyses, we used CRISPR/Cas9 gene editing to create strains expressing HA or  
295 FLAG tagged versions of the DSB proteins from the endogenous loci (Table 1), and we  
296 detected the proteins using indirect immunofluorescence.

297 We used the image analysis pipeline outlined in Figure 5A (described in more detail in  
298 Supplemental Figure 3) to identify DSB protein foci and to conduct object-based colocalization  
299 analyses to assess the degree of colocalization detected for pairwise combinations of the  
300 imaged DSB proteins within individual nuclei. As negative controls, we generated virtual nuclei  
301 in which the second channel in each combination was rotated by 90° in XY, resulting in virtual  
302 composite images in which DSB protein foci are modified in location, but numbers, sizes, and  
303 intensity distributions of foci remain unaltered. Collectively, our analyses indicate that the DSB-  
304 3, DSB-2, and DSB-1 proteins strongly colocalize with each other in meiotic prophase nuclei.

305 Analysis of all three pairwise combinations of DSB-1, DSB-2, and DSB-3 foci are  
306 presented in Figure 5B-D and Supplemental Figure 4. For all three pairs, numbers of foci for the  
307 two channels detected in each nucleus were strongly correlated, consistent with expectations  
308 for components of the same protein complex. Further, substantial colocalization was observed  
309 for each pair. For example, we found that  $45 \pm 5\%$  of DSB-2 foci colocalized with DSB-3::GFP  
310 foci, and conversely, that  $37 \pm 7\%$  of DSB-3::GFP foci colocalized with DSB-2 foci. In contrast,  
311 negative control coincidental colocalization values were  $10 \pm 3\%$  and  $8 \pm 3\%$ , respectively.  
312 Similarly,  $52 \pm 8\%$  of 3xFLAG::DSB-3 foci colocalized with 3xHA::DSB-1 foci, and conversely  
313  $55\% \pm 5\%$  of 3xHA::DSB-1 foci colocalized with 3xFLAG::DSB-3 foci. Likewise,  $43 \pm 11\%$  of

314 3xHA::DSB-1 foci colocalized with DSB-2 foci, and conversely  $41 \pm 9\%$  of DSB-2 foci  
315 colocalized with 3xHA::DSB-1 foci.

316 Although substantial colocalization was observed for all pairwise combination of DSB-1,  
317 DSB-2 and DSB-3 foci, the fraction of colocalization may seem lower than might be anticipated  
318 for proteins comprising the same protein complex. We note, however, that incomplete  
319 colocalization has been similarly observed for the Rec114 and Mei4 proteins in both budding  
320 yeast and mouse meiocytes (22, 26). One possible explanation is that only a subset of these  
321 protein molecules occur together in complexes, while other molecules exist separately within the  
322 nucleus; however, this explanation is not easily reconciled with the observed interdependence  
323 among these proteins. Another possibility is that the observed degree of colocalization reflects  
324 limitations on our ability to detect all of the DSB-1, DSB-2 and DSB-3 target molecules that are  
325 present. *e.g.* because of isoforms that lack epitopes or because the complexes and/or their  
326 components may be organized in a manner that makes some epitopes inaccessible to detection  
327 reagents.

328 This latter possibility is supported by data from an experiment in which we assessed  
329 colocalization for fluorescent foci representing separate epitopes on the same protein,  
330 3xHA::DSB-2, expressed from the endogenous *dsb-2* locus. Specifically, we used a mouse  
331 monoclonal antibody (mAB) against the HA epitope and rabbit polyclonal (pAB) antibodies  
332 raised against the C-terminal 100 amino acids of the DSB-2 protein. The numbers of foci for the  
333 two channels detected in each nucleus were strongly correlated (Figure 5C), as expected for  
334 foci representing the same target molecule. However, colocalization was again incomplete, in  
335 both directions:  $44 \pm 5\%$  of DSB-2 pAB foci colocalized with HA mAB foci, and conversely,  $48 \pm$   
336  $2\%$  of HA mAB foci colocalized with DSB-2 pAB foci. This incomplete colocalization of HA mAB  
337 and DSB-2 pAB fluorescent signals supports the conclusion that a subset of epitopes on DSB-2  
338 proteins present in the nucleus were not detected in these experiments.

339 For the DSB-2 - DSB-3::GFP combination, we also conducted a colocalization analysis  
340 on “super-spread” nuclei, in which chromosomes were dispersed over an area 6-10 times larger  
341 than that of an unperturbed nucleus (46) (Materials and Methods and Supplemental Figure S5).  
342 The numbers of foci detected using this approach were 3-5 times higher than the numbers  
343 observed in our analysis of partial spreads, but a similar degree of colocalization was detected:  
344  $55 \pm 16\%$  of DSB-2 foci colocalized with DSB-3::GFP foci, and conversely,  $44 \pm 10\%$  of DSB-  
345 3::GFP foci colocalized with DSB-2 foci. The observation of larger numbers of foci with a  
346 comparable degree of colocalization suggests the possibility that groups of DSB protein  
347 complexes may be split into smaller cohorts by the super-spread procedure.

348

### 349 **The Presence and Colocalization of DSB-3, DSB-2, and DSB-1 Is Not Confined to the** 350 **Meiotic Chromosomal Axis**

351 Previous chromatin immunoprecipitation experiments in *S. cerevisiae* have shown that  
352 Mei4 and Rec114 are enriched at DNA sequences that are also enriched for meiosis-specific  
353 axis proteins Hop1 and Red1 (28, 30). Moreover, *M. musculus* Mei4 and Rec114 were found to  
354 colocalize cytologically on the axes of meiotic prophase chromosomes (14, 15, 26). Based on  
355 these observations, it has been proposed that the Rec114-Mei4 complex primarily functions at  
356 the chromosome axes. Strikingly, DSB-1, DSB-2, and DSB-3 foci are not enriched at the  
357 chromosome axis during *C. elegans* meiosis. Rather, we find that most foci are detected away  
358 from the axis, in the associated chromatin loops (Figure 6A). To quantify axis association, we  
359 first segmented images by creating axis masks for each nucleus that corresponded to the pixels  
360 containing the immunofluorescence signal derived from the axis protein HTP-3 (Supplemental  
361 Figure 3B), then for each DSB protein tested, we identified the subset of foci, termed “axis-  
362 associated foci” for which some or all of the pixels coincided with the axis mask. This approach  
363 indicated that only 15-30% of DSB protein foci detected in our analyses overlapped with



364 chromosome axis signal, indicating that on spread chromosomes from meiotic nuclei. the  
365 preponderance of DSB protein foci detected were not associated with the meiotic chromosome  
366 axes.

367 We also assessed whether DSB protein foci associated with the chromosome axis might  
368 exhibit a higher degree of colocalization with their DSB protein partners relative to the level of  
369 colocalization observed for the full set of foci within the nucleus (Figure 6B). However, this  
370 analysis did not reveal any consistent enrichment of colocalization for DSB protein foci that were  
371 linked to the chromosome axis. Thus, while components of the meiotic chromosome axis do  
372 have roles in promoting and regulating SPO-11 dependent DSB forming activity in *C. elegans*  
373 meiosis(47–49), these roles do not appear to be mediated by concentrating DSB-1-DSB-2-DSB-  
374 3 complexes in close proximity to the chromosome axis.

375

## 376 **Discussion**

377 Initiation of meiotic recombination by programmed DSB formation is an ancient and  
378 conserved feature of the meiotic program that predates divergence of plants, animals and fungi.  
379 Thus, it is not surprising that Spo11, the protein directly responsible for catalyzing DSB  
380 formation, is strongly conserved across kingdoms, given constraints imposed by its requirement  
381 to interact with and perform chemistry on DNA. However, many additional proteins required for  
382 DSB formation had been identified in the yeast system, but plant and metazoan homologs of  
383 these auxiliary DSB proteins had long eluded detection by standard BLAST analyses. The  
384 barrier to detection of homologs outside fungi was eventually breached using secondary  
385 structure prediction coupled to MAFFT alignment and phylogenomically-oriented PSI-BLAST  
386 searches (13), which identified characteristic SSMs for putative Mei4 and Rec114 homologs;

387 moreover, the veracity of these predictions was borne out by demonstration of meiotic roles in  
388 mouse mutants (13–15).

389         Auxiliary proteins involved in DSB formation during *C. elegans* meiosis were identified  
390 independently based on analysis of meiotic mutants ((20, 21), this work). However, recognition  
391 of these proteins as distant homologs of conserved DSB-promoting factors came later, after  
392 their functional importance in DSB formation was already established (12). Identification of DSB-  
393 1 and DSB-2 as Rec114 homologs was further solidified by alignments of the predicted  
394 structure of DSB-1 and DSB-2 with the solved structure of mouse REC114 ((42); this work).  
395 Likewise, our initial identification of *C. elegans* DSB-3 as a factor important for meiotic DSB  
396 formation was similarly based on functional data. The identity of DSB-3 as a putative Mei4/MEI4  
397 ortholog was derived computationally from alignments and collinearity of SSMs among  
398 metazoan homologs, and this identification was reinforced by demonstration of Y2H  
399 interactions, colocalization and interdependence with Rec114 homologs DSB-1 and DSB-2.  
400 Thus, despite a high degree of divergence at the amino acid sequence level, our data  
401 collectively support the conclusion that DSB-1, DSB-2 and DSB-3 together form complexes that  
402 are the functional counterpart of Rec114-Mei4 complexes.

403         Having established conservation among the auxiliary complexes that promote the DSB-  
404 forming activity of Spo11, our analyses also reveal interesting differences. First, whereas yeast  
405 and mice each have only a single Rec114/REC114 ortholog, nematodes in the *Caenorhabditis*  
406 genus each have 2 paralogs, indicating duplication and divergence in the parental lineage.  
407 DSB-1 and DSB-2 are neither identical to nor functionally interchangeable with each other, as  
408 DSB formation is strongly reduced in *dsb-2* mutants and eliminated in *dsb-1* mutants.  
409 Interestingly, recent biochemical analyses indicate a 2 Rec114 : 1 Mei4 stoichiometry of the  
410 yeast complex (27). The interdependence of DSB-1 and DSB-2 for nuclear enrichment, in  
411 combination with the colocalization observed in chromosome spreads (this work) suggest that

412 the *C. elegans* complexes may typically contain one DSB-1 subunit and one DSB-2 subunit  
413 (rather than two identical subunits). However, there is low residual DSB-promoting activity  
414 present in *dsb-2* null mutants, suggesting that complexes with two DSB-1 subunits may form  
415 and be partially functional when DSB-2 is absent. While the data do support functional  
416 diversification of the *C. elegans* Rec114 paralogs, however, how this diversification came about  
417 and/or how and why it persisted remain unknown.

418         A second apparent distinction between *C. elegans* DSB-1, DSB-2 and DSB-3 and their  
419 mouse counterparts is the observed relationship to meiotic chromosome axes. Mouse REC114  
420 and MEI4 are reported to localize predominantly at chromosome axes in spread preparations of  
421 meiotic prophase chromosomes, in a manner mediated by Mer2 homolog IHO1 (15, 26) . This  
422 association with chromosome axes led to the proposal that a major role for the Rec114 – Mei4  
423 complex is to recruit the Spo11 core complex to the axis to activate its DSB-promoting activity  
424 specifically in close proximity to the axis, where DSB repair predominantly occurs. In *C.*  
425 *elegans*, meiosis specific HORMAD proteins HTP-1 and HTP-3, which are major building blocks  
426 of the chromosome axis, are implicated in playing important roles in promoting and regulating  
427 meiotic DSB formation (47–49). HTP-3 is strictly required for DSB formation, and HTP-1 is  
428 required for normal levels of DSB activity. However, despite this requirement for axis  
429 components in DSB formation, our analysis here indicates that DSB-1-DSB-2-DSB-3 complexes  
430 are not preferentially enriched adjacent to axes. This may reflect lack of an apparent  
431 *Caenorhabditis* ortholog of IHO1, which is recruited to mouse meiotic chromosomes through a  
432 direct interaction with HORMAD1.

433         Given the observed lack of enrichment of DSB-1, DSB-2 and DSB-3 at the axes, the  
434 role(s) of *C. elegans* meiotic HORMAD proteins in promoting DSB formation may not be strictly  
435 limited to recruiting the homologs of Rec114 and Mei4 to chromosomes. One possibility is that  
436 the *C. elegans* HORMADs might be involved in activating the subset of DSB-1-DSB-2-DSB-3

437 complexes that do occur in close proximity to the axis. Alternatively, the role(s) of the *C. elegans*  
438 axis proteins might be indirect, e.g. assembly of the axis might potentially signal successful  
439 formation of chromosome structure that is proficient for meiotic DSB repair, thereby licensing  
440 the nucleus that it is safe to proceed with DSB formation. The possibility of this signaling  
441 scenario is strengthened by prior work demonstrating a role for *C. elegans* HORMAD proteins in  
442 a signaling process that sustains activity of protein kinase CHK-2, a master regulator of multiple  
443 processes during meiosis, including nuclear enrichment of DSB-1 and DSB-2 (20, 21, 36, 50).

444         It is possible that the observed difference between mice and *C. elegans* regarding axis  
445 enrichment of Rec114-Mei4 complexes may be related to differences in spatial organization of  
446 recombination events in the genome and/or in coupling between DSB repair and homolog  
447 recognition. Meiotic recombination in mice occurs predominantly within 1-2 kb “hotspot” regions,  
448 separated by larger (50-100kb) cold regions where the probability of recombination is very low.  
449 A similar “local hotspot” distribution of recombination events was not observed in *C. elegans* (for  
450 the portion of the genome studied) (51, 52), suggesting that different constraints are operating  
451 to dictate where DSBs may form. Further, there is substantial variation among organisms  
452 regarding their relative dependence on different mechanisms that promote pairwise alignment  
453 and synapsis between homologous chromosomes. In mouse meiosis, formation of early  
454 SPO11-dependent DSB repair intermediates appears to be the main mechanism of homology  
455 verification, required to trigger SC assembly and constraining it to occur strictly between aligned  
456 homologous chromosomes (53, 54). In contrast, in *C. elegans*, local *cis*-acting chromosomal  
457 domains known as pairing centers play a primary role in homolog recognition, and these are  
458 capable of promoting largely successful pairwise synapsis between homologs even in the  
459 absence of recombination (55). We speculate that differences in the constraints governing the  
460 genomic locations of DSBs and/or differences in dependence on DSBs for homology verification  
461 may have either contributed to, or been enabled by, diversification of meiotic DSB auxiliary

462 protein complexes. We note that high divergence among essential components of key biological  
463 processes is a hallmark not only of the meiotic program, but of reproduction more generally (1,  
464 56, 57). This likely reflects multiple underlying factors, including the potential for changes in  
465 such proteins to have an immediate impact on processes that directly affect fitness by  
466 modulating reproductive success.

467         A key question regarding the role(s) of the Rec114-Mei4 (or DSB-1-DSB-2-DSB-3)  
468 complexes is how exactly they are functioning to promote Spo11 activity. It was recently  
469 proposed that Rec114-Mei4 complexes function by forming large DNA-dependent biomolecular  
470 condensates that promote DSB activity by causing a high local concentration of Spo11 core  
471 complexes at presumptive DSB sites held adjacent to the chromosome axis (27). This model  
472 was proposed based on: 1) a large segment of the Rec114 protein exhibiting a high probability  
473 of disorder, 2) the ability of purified Rec114-Mei4 complexes to promote formation of DNA-  
474 dependent condensates *in vitro*, and 3) an ability of Rec114-Mei4 complexes to interact with  
475 and recruit the Spo11 core complex. While evaluating potential for *in vitro* condensation is  
476 outside the scope of the current study, we note that some of the above attributes may be shared  
477 with the *C. elegans* DSB-1-DSB-2-DSB-3 complex. First, based on the Y2H data, the DSB-1-  
478 DSB-2-DSB-3 complex is expected to be able to interact with SPO-11 complexes. However, in  
479 yeast, interactions occur between Rec114 and the Rec102 and Rec104 components (which  
480 together correspond to Top6BL) of the Spo11 core complex, whereas in *C. elegans*, a Top6BL  
481 homolog has not yet been identified, and DSB-1 can interact directly with SPO-11 itself in the  
482 Y2H assay. Second, the DSB-1 and DSB-2 proteins have long segments with predicted protein  
483 disorder scores that hover around 0.5 and include short segments scoring >0.5, leaving it  
484 ambiguous whether these might represent *bona fide* disordered regions. Third, the observation  
485 that higher numbers of DSB-2 and DSB-3 foci are detected in super-spread nuclei than in  
486 moderately-spread nuclei raises the possibility that these proteins might normally occur in larger

487 groups within intact nuclei, potentially analogous to the condensates proposed to occur during  
488 yeast meiosis. In either system, future investigations aiming to test predictions of the  
489 condensation model will need to address the challenge of visualizing complex dynamic behavior  
490 *in vivo*.

491

## 492 **Materials and Methods**

### 493 *C. elegans* strains

494 Strains were cultured at 20°C using standard nematode growth conditions (58) unless  
495 otherwise noted. Strains used in this study:

496

497 AV28 *dsb-3(me6ts)* IV

498 AV776 *spo-11(me44)* IV / *nT1[qIs51]* (IV;V)

499 AV818 *mels8[gfp::cosa-1]* II; *cosa-1(tm3298)* III

500 AV913 *dsb-3(me6ts)* IV

501 AV958 *dsb-3(me6ts) dpy-20(e1282)* IV

502 AV994 *dpy-3(e184) dsb-3(me6ts)* IV

503 AV995 *dsb-3(me115)* IV / *nT1* (IV;V)

504 \* AV1029 *meSi7 [sun1p::dsb-3::gfp::sun-1 3'UTR]* II; *dsb-3(me115)* IV

505 AV1045 *meSi7* II; *dsb-3(me115) dsb-1(we11)* / *nT1* IV

506 AV1081 *meSi7 dsb-2(me96) / mnC1* II; *dsb-3(me115)* IV

507 AV1095 *dsb-3(me115) / tmC5 [F36H1.3(tmls1220)]* IV

508 ^ AV1102 *dsb-1(me124[3xha::dsb-1]) dsb-3(me125[3xflag::dsb-3])* IV

509 ^ AV1115 *dsb-2(me132)[3xha::dsb-2]* II

510 AV1132 *mels8[gfp::cosa-1]* II; *cosa-1(tm3298)* III; *dsb-3(me115)* IV / *nT1* (IV;V)

511 Bristol N2 Wild type

512 \* The transgene allowing expression of the DSB-3::GFP fusion protein was obtained using the  
513 Mos Single Copy Insertion strategy (MosSCI, (59)) using the *ttTi5605* insertion on chromosome  
514 II as a landing site. The donor plasmid, pBR253, was obtained by assembling fragments  
515 carrying the upstream promoter region of the *sun-1* gene, the *sun-1* downstream 3'UTR region,  
516 and the genomic sequence of *dsb-3* (coding exons and introns), together with a DNA fragment  
517 containing a version of GFP optimized for germline expression (60), into pBR49, a derivative of  
518 pCFJ350 modified to enable type IIs restriction/ligation cloning (61). The genomic fragments  
519 were obtained by PCR amplification of wild-type genomic DNA using the following primer pairs.  
520 The primers for the *sun-1* promoter were oBR840  
521 (cgtcgatgcacaatccGGTCTCaCCTGattccagattcatcgctcggttt) and oBR841  
522 (agtggaatgtcagGGTCTCaCATaccgagtagatctggaagttag). The primers for *dsb-3* CDS were:  
523 oBR836 (cgtogatgcacaatccGGTCTCaTATGATCGAAATTACCGATGATGAGG)  
524 and oBR837 (agtggaatgtcagGGTCTCaCTCCATTGCTATATCTCTGTTGATTATCTAAAAAC)  
525 The primers for the *sun-1* 3'UTR were oBR842  
526 (cgtcgatgcacaatccGGTCTCaTAAAaaacgccgtattattgttcctgc) and oBR843  
527 (agtggaatgtcagGGTCTCaGTCAttagtaagttaagctaaagtttagcag). The GFP fragment was obtained  
528 by PCR amplification of pCFJ1848 (60), using oBR406  
529 (cgatgcacaatccGGTCTCaGGAGGTGGATCATCCTCCACATCATCCT) and oBR407  
530 (agtggaatgtcagGGTCTCaTTTATGGGGAAGTACCGGATGACG). Correct assembly of all  
531 fragments within the donor plasmids was verified by sequencing.

532 ^ In order to perform pairwise colocalization experiments between DSB-1, DSB-2 and DSB-3,  
533 we created strains expressing endogenously-tagged versions of these proteins so each pair  
534 could be detected using compatible primary antibodies generated in different host organisms.  
535 For these strains, we used direct injection of Cas9 protein (PNAbio) complexed with single-

536 guide RNA (sgRNA) (Dharmacon) using the protocol of (62). CRISPR targeting (crRNA)  
537 sequences were designed using Benchling (<https://benchling.com/>). Small single-stranded  
538 oligonucleotides (< 200 bp) were purchased (Integrated DNA Technologies) and used as the  
539 repair templates to generate the various tags and nonsense alleles. N2 worms (P0) were  
540 injected with the mix together with sgRNA and repair template for the *dpy-10* co-CRISPR  
541 marker (63). Rol F1s (carrying *dpy-10(Rol)* marker) were singled out, and a subset of F2  
542 progeny was fixed and stained with DAPI (see below) to assess the phenotype of diakinesis  
543 nuclei for null alleles. From plates containing worms exhibiting univalents at diakinesis, the new  
544 mutations were recovered from siblings of the imaged worms and balanced by *nT1* IV or *tmc5*  
545 IV. Tagged alleles were confirmed by immunofluorescence staining (see below). All edits were  
546 confirmed by Sanger sequencing of PCR fragments amplified using primers designed to detect  
547 the edit event. The crRNAs used, description of the edits, and PCR sequencing primers used  
548 are included in Supplemental Table 1.

#### 549 Isolation, mapping, and genomic identification of the *dsb-3(me6ts)* mutation

550 *dsb-3(me6ts)* was isolated in a genetic screen for meiotic mutants exhibiting a high incidence of  
551 males as described in (64). After backcrossing (four times) to generate the AV913 strain,  
552 homozygous *me6ts* worms were subjected to whole-genome sequencing. DNA was extracted  
553 from ~8 60mm confluent plates of N2 and AV913 gravid adult worms; worms were rinsed twice  
554 in M9 and resuspended in 10 mM EDTA and 0.1 M NaCl. Worms were then: pelleted; flash  
555 frozen in liquid nitrogen; resuspended in 450  $\mu$ L of lysis buffer containing 0.1 M Tris, pH 8.5, 0.1  
556 M NaCl, 50 mM EDTA, and 1% SDS plus 40  $\mu$ L of 10 mg/mL proteinase K in TE (10 mM Tris, 1  
557 mM EDTA), pH 7.4; vortexed; and incubated at 62°C for 45 min. Two successive phenol-  
558 chloroform extractions were performed using the Phase Lock gel tubes from Invitrogen, and  
559 DNA was precipitated with 1 mL of 100% ethanol plus 40  $\mu$ L of saturated  $\text{NH}_4\text{Ac}$  (5 M) and 1  $\mu$ L  
560 of 20 mg/mL GlycoBlue. The DNA pellet was washed with 70% ethanol, air dried, and



561 resuspended in 50  $\mu$ L of TE, pH 7.4. Paired end libraries were prepared using the Nextera  
562 technology (Illumina), and sequencing was performed on an MiSeq sequencer ( $2 \times 75$  bp)  
563 through the Stanford Functional Genomics Facility. To analyze the genomic data, we used an  
564 analysis pipeline adapted from GATK's recommended best practices (65–67). Reads were  
565 mapped to *C. elegans* reference genome (WBcel 235.82) using the Bowtie 2 software (68).  
566 Variant calling was performed using Haplotype Caller software from GATK, and lists from  
567 AV913 and N2 were compared to eliminate non-causal variants. The predicted effects of  
568 variants specific to AV913 were then annotated using SnpEff (69).

569 Initial genetic mapping experiments had placed *dsb-3(me6ts)* within 2 cM of *unc-5*,  
570 located at 1.78 cM on chromosome IV; the above sequence analysis identified several  
571 candidate mutations within this region. Additional mapping crosses located *dsb-3(me6ts)* to the  
572 left of *dpy-20* (at 5.22 cM) and near or to the left of *unc-24* (at 3.51 cM). Further, we found that  
573 *eDf18* (which deletes the region between 3.7- 4.19 cM) complements *dsb-3(me6ts)*. Together,  
574 these experiments identified a G  $\rightarrow$  A transition at genomic position IV: 7758710 (WS279), in  
575 the second coding exon of the uncharacterized gene *C46A5.5*, as the likely causal mutation  
576 responsible for the *dsb-3(me6ts)* mutant phenotype.

#### 577 DAPI staining of oocyte chromosomes and Irradiation Assay

578 Numbers of DNA bodies present in diakinesis oocytes were assessed in intact adult  
579 hermaphrodites of the indicated ages, raised at the indicated temperatures, fixed in ethanol and  
580 stained with 4',6-diamidino-2-phenylindole (DAPI) as in (70). This method underestimates the  
581 frequency of achiasmate chromosomes, as some univalents lie too close to each other to be  
582 resolved unambiguously.

583 To test for rescue of bivalent formation by exogenously derived DSBs, worms were exposed to  
584 5,000 rad (50 Gy) of  $\gamma$ -irradiation using a Cs-137 source at 20 h post-L4 stage. Worms were

585 fixed and stained at 18–20 h post-irradiation, and numbers of DAPI bodies were counted in  
586 oocyte nuclei in the -1 to -3 positions.

#### 587 Bioinformatic identification of homology between DSB-3 and Mei4

588 PSI Blast searches using the MPI BLAST server (71) , initiated using an alignment of DSB-3  
589 homologs from diverse roundworm species as the query, identified a putative *Brugia malayi*  
590 DSB-3 homolog. A subsequent round of PSI-BLAST searches, initiated using an alignment with  
591 the putative *B. malayi* homolog as the header sequence and initially focusing on the N-terminal  
592 portion of the protein, led to retrieval of plant and animal Mei4 homologs. Similarity in protein  
593 lengths and patterns of predicted secondary structure were prioritized over E-value  
594 considerations in selection of proteins chosen for the multiple sequence alignment presented in  
595 Supplemental Figure 2, which was generated using MAFFT Version 7.0 with gap opening  
596 penalty parameter set to 2.0 and offset value parameter set to 0.125.

#### 597 Yeast Two-Hybrid Analysis

598 Full-length DSB-1, DSB-2, DSB-3, and N-terminally truncated SPO-11 (SPO-11 $\Delta$ 1-47),  
599 DSB-1 (DSB-1 $\Delta$ 1-33) ORFs were individually cloned into the *Bam*HI and *Pst*I sites of pBridge,  
600 and the *Bam*HI and *Xho*I sites of pGADT7 (Clontech) to generate fusion proteins with the N-  
601 terminal Gal4 DNA-binding domain (Gal4BD) or activation domain (Gal4AD). The PJ69-4A  
602 yeast strain (*MATa trp1-901 leu2-3,112 ura3-52 his3-200 gal4 $\Delta$  gal8 $\Delta$  GAL2-ADE2*  
603 *LYS2::GAL1-HIS3 met2::GAL7-lacZ*) was co-transformed with the indicated pairs of constructs  
604 encoding Gal4BD and Gal4AD fusion proteins (and/or empty vector negative controls).  
605 Transformed cells expressing Gal4BD and Gal4AD fusion proteins were selected in SD-Leu<sup>-</sup>Trp<sup>-</sup>  
606 , a drop-out medium without leucine and tryptophan. Protein interactions were assayed by  
607 growing transformed cells for 5 days at 30°C on selective media lacking leucine, tryptophan,  
608 histidine, and adenine (SD-Leu<sup>-</sup>Trp<sup>-</sup>His<sup>-</sup>Ade<sup>-</sup>). Three independent repeats of each transformation

609 were performed for all pairwise combinations. The full-length SPO-11 ORF was excluded from  
610 analysis of combinations as it exhibited autoactivation in negative control experiments.

### 611 Immunofluorescence Methods

612 The following primary antibodies were used: mouse anti-HA (1:1000, Covance 16B12  
613 clone), rabbit anti-FLAG (1:5000, Sigma Aldrich), rabbit anti-DSB-2 (1:5.000, (20)), guinea pig  
614 anti-DSB-1 (1:500, (21)), rabbit anti-GFP (1:200, (31)), guinea pig anti-HIM-8 (1:500, (32)),  
615 chicken anti-HTP-3 (1:400, (33)), rabbit anti-SYP-2 (1:200, (35)), rat anti-RAD-51 (1:500, (20)),  
616 guinea pig anti-SUN-1 S24pi (1:700, (72)), chicken anti-GFP (1:500, (A01694, Genscript)).  
617 Secondary antibodies were Alexa Fluor 488, 555 and 647-conjugated goat antibodies directed  
618 against the appropriate species (1:400, Life Technologies).

619 For immunofluorescence experiments involving whole mount gonads, dissection of  
620 gonads, fixation, immuno-staining and DAPI counterstaining were performed as in (48) .

621 For experiments involving nuclear spreads, spreading was performed as in (73). The  
622 gonads of 20–100 adult worms were dissected in 10  $\mu$ L Dissection solution (75% v/v Hank's  
623 Balanced Salt Solution [HBSS, Life Technology, 24020-117] with 0.1% v/v Tween-20) on an  
624 ethanol-washed plain slide. 50  $\mu$ L of spreading solution (32  $\mu$ L of Fixative [4% w/v  
625 Paraformaldehyde and 3.2%–3.6% w/v Sucrose in water], 16  $\mu$ L of Lipsol solution [1% v/v in  
626 water], 2  $\mu$ L of Sarcosyl solution [1% w/v of Sarcosyl in water]) were added, and gonads were  
627 immediately distributed over the whole slide using a pipette tip. Slides were then left to dry at  
628 room temperature overnight, washed for 20 minutes in methanol at -20°C and rehydrated by  
629 washing 3 times for 5 minutes in PBS-T. A 20-minute blocking in 1% w/v BSA in PBS-T at room  
630 temperature was followed by overnight incubation with primary antibodies at room temperature  
631 (antibodies diluted in: 1% w/v BSA in PBS-T). Slides were washed 3 times for 5 minutes in PBS-

632 T before secondary antibody incubation for 2 hours at room temperature. After PBS-T washes,  
633 the samples were mounted in Vectashield (Vector).

634 To dissect large quantities of *C. elegans* gonads for spreads, we employed an  
635 alternative method for disrupting worms, using a 125V ~ 60Hz drill capable of achieving 1,600  
636 rotations per minute. Briefly, we synchronized worms by using the standard bleaching protocol  
637 (74) and allowed worms grow to adulthood (L4 + 24 hours). The worms were then washed with  
638 dissection solution into a 1.7 mL Eppendorf tube suspended in an ethanol ice bath. The worms  
639 were then disrupted using a 1/64 inch bit on the drill with its maximum power by angling the drill  
640 bit against the Eppendorf tube wall. 3  $\mu$ L aliquots were taken from the tube every 20 seconds  
641 and monitored microscopically until most of the gonads had been extruded from the worms  
642 during the drill-induced disruption.

#### 643 FISH experiments

644 Barcoded Oligopaint probes targeting a 1 Mb segment of chromosome II (genomic  
645 coordinates 11,500,001-12,500,001) were generated as in (46). Gonads from animals at 24  
646 hours after L4 were dissected on a coverslip and fixed in 1% paraformaldehyde for 5 min. A  
647 slide (Superfrost Plus) was then placed on the coverslip and immersed in liquid N<sub>2</sub>. The sample  
648 was then incubated in -20°C methanol for 2 minutes and rehydrated by placing in PBST for at  
649 least 10 minutes. Next, the sample was incubated in 0.1 M HCl for 5 minutes and washed in  
650 PBST 3 times for 5 minutes each. The samples were then incubated for 5 minutes each in 2x  
651 SSCT (2x saline sodium citrate with 0.1% Tween) solutions with increasing concentrations of  
652 formamide: 0%, 5%, 10%, 25%, and 50%. The sample was then incubated in a prewarmed  
653 42°C solution of 50% formamide in 2x SSCT for 1 hour. 2  $\mu$ L of Oligopaint probe (1,000 ng/ $\mu$ L in  
654 dH<sub>2</sub>O) was diluted into 30  $\mu$ L of hybridization solution (50% formamide, 10% Dextran Sulfate,  
655 2x SSC, 0.1% Tween-20) for each slide. After 1 hour incubation, slides were taken out of the  
656 50% formamide solution, wiped, and incubated in 95% ethanol for 5 minutes. Then, the probe

657 hybridization solution was applied to the sample with a coverslip, and the sample was denatured  
658 for 10 minutes at 77°C on a heat block. After denaturing, the sample was incubated with the  
659 probe hybridization solution at 42°C overnight. The next day, samples were washed 2 times in  
660 42°C 50% formamide in 2x SSCT for 30 minutes each, and the coverslip was removed from the  
661 slide. Then, the sample was incubated for 5 minutes each in solutions with decreasing  
662 concentrations of formamide in 2x SSCT: 25%, 10%, and 5%. Samples were then washed 2  
663 times for 10 minutes each in 2x SSCT. The Oligopaint probes were visualized by hybridizing  
664 Cy3-labelled oligos (agctgatcgtggcggttgatg) to the Oligopaint probe barcode sequence. To do  
665 this, the Cy3-labelled probes (diluted 1:1000 in 25% ethylene carbonate in 2x SSC) were  
666 applied to the sample with a coverslip and incubated for 15 minutes. Then, the sample was  
667 washed and the coverslip was removed by incubating in 30% formamide solution in 2x SSCT for  
668 3 min. The samples were then washed twice in 2x SSC and mounted in Vectashield.

669 For quantification of pairing between FISH signals, gonads were divided into 6 zones.  
670 Zone 1 corresponds to the distal tip region of the gonad with only premeiotic nuclei. The gonad  
671 region extending from the transition zone to the end of the pachytene stage was split up into 5  
672 equally sized regions, Zones 2-6. The stitched image of the gonad was cropped into zones,  
673 peaks of FISH signals were identified using ImageJ plugin 3D Maxima Finder (75). Each  
674 identified peak was manually assigned to a nucleus, and distances between homologous signal  
675 peaks in the same nucleus were calculated.

## 676 Image Acquisition

677 For spread nuclei, imaging, deconvolution, stitching and 3D-SIM reconstruction were  
678 performed as in (73). Spreading results in squashing of *C. elegans* germline nuclei from 5 to 1-2  
679 µm in thickness. 3D-SIM images were obtained as 125 nm spaced Z-stacks, using a 100x NA  
680 1.40 objective on a DeltaVison OMX Blaze microscopy system, 3D-reconstructed and corrected

681 for registration using SoftWoRx. For display, images were projected using maximum intensity  
682 projection in ImageJ or SoftWoRx.

683 For imaging of whole-mount gonads. wide field (WF) images were obtained as 200 nm  
684 spaced Z-stacks, using a 100x NA 1.40 objective on a DeltaVison OMX Blaze microscopy  
685 system, deconvolved and corrected for registration using SoftWoRx. Subsequently, gonads  
686 were assembled using the “Grid/Collection” plugin (76) in ImageJ. For display, assembled  
687 gonads were projected using maximum intensity projection in ImageJ.

688 For display, contrast and brightness were adjusted in individual color channels using  
689 ImageJ.

#### 690 Quantification of RAD-51 Foci and COSA-1 Foci

691 For quantification of RAD-51 foci in whole-mount gonads, at least three gonads were  
692 counted per genotype. Gonads were divided into seven zones: the premeiotic zone (PM), which  
693 includes all nuclei prior to the transition zone (where nuclei enter meiotic prophase), and six  
694 consecutive equal-sized zones encompassing the region of the gonad from the transition zone  
695 to the end of the pachytene stage. For the GFP::COSA-1 experiments, foci were counted in  
696 nuclei within the last six cell rows of the gonad.

#### 697 Identification of DSB Protein Foci and Object-Based Colocalization Analysis

698 For Figures 5 and 6, images were analyzed using an object-based colocalization  
699 analysis pipeline that combined standard functions available in ImageJ in conjunction with a  
700 custom Python script. A detailed description of the colocalization analysis pipeline is presented  
701 in Supplemental Figure 3. For these analyses, 32-bit Z-stacks of SIM images of  
702 immunofluorescence signals for at least two different antibodies detecting DSB proteins (C1 and  
703 C2). were imported into ImageJ (77, 78) with the Fiji distribution (79). The signal maxima for

704 each channel, identified as foci by the image analysis pipeline were qualitatively compared to  
705 the original image to verify accurate identification of foci.

706 For colocalization analysis of DSB-2 and DSB-3::GFP foci on super-spread nuclei  
707 (Supplemental Figure S5), the same pipeline was used, except that foci were analyzed within  
708 3.43 x 3.43  $\mu\text{m}$  square ROIs located entirely within the spread (1-3 ROIs per nucleus).

709

#### 710 Data and reagent availability

711 The original 32-bit individual nucleus ImageJ files, the segmented axis channel files, the  
712 identified peaks, the values used for and the output position files from the 3D Maxima Finder for  
713 each nucleus, the custom python script used to identify colocalization, and the resulting  
714 spreadsheet files showing colocalization data for each nucleus will be made available from the  
715 BioStudies Database, Accession Number S-BSST568.

716 Strains and primary images used in this research are available on request from A.M.V.  
717 ([annev@stanford.edu](mailto:annev@stanford.edu)).

718

## 719 **Figures**

720 **Figure 1. Identification of *dsb-3* as a gene required for the formation of meiotic**  
721 **crossovers.** (A) Representative images of DAPI-stained diakinesis-stage oocyte nuclei from  
722 adult worms of the indicated genotypes fixed at 1 day post L4. Left: WT nucleus with six DAPI  
723 bodies corresponding to six pairs of homologs connected by chiasmata (bivalents). Middle: *dsb-*  
724 *3(me6ts)* nucleus with 9 DAPI bodies (3 bivalents and 6 univalents). Right: *dsb-3(me115)*  
725 nucleus with 12 DAPI bodies (all univalents). Below: Graphs show quantification of the mean  
726 number of DAPI bodies/ nucleus; error bars indicate standard deviation, and numbers in

727 parentheses indicate the numbers of nuclei assayed. Assays for WT and for *dsb-3(me115)*  
728 homozygotes were performed at 20°C; assays for *dsb-3(me6ts)* homozygotes and *dsb-*  
729 *3(me6ts)/dsb-3(me115)* heterozygotes were performed at 25°C. (B) Schematic showing the  
730 *dsb-3* gene structure, with the positions and nature of mutations used in this work; white boxes  
731 represent UTR sequences, black boxes represent exons, lines indicate introns. Scale bar  
732 indicates 100 bp. (C) Top: Whole-mount immunofluorescence images of GFP::COSA-1 foci,  
733 which correspond to the single CO site on each homolog pair, in nuclei at the late pachytene  
734 stage. WT nuclei have 6 GFP::COSA-1 foci, while foci are reduced or absent entirely in the *dsb-*  
735 *3(me115)* mutant. Below: Stacked bar graphs showing the distribution of GFP::COSA-1 foci  
736 counts in nuclei from WT and *dsb-3(me115)* mutants. Mean numbers of GFP::COSA-1 foci per  
737 nucleus are indicated, with the numbers of nuclei assayed in parentheses. (D) Homolog pairing  
738 assayed by immunofluorescence of X-Chromosome pairing center binding protein HIM-8 (Top)  
739 or fluorescence *in situ* hybridization FISH detecting a 1Mbp segment of chromosome II (Bottom)  
740 in pachytene nuclei of whole-mount gonads. A single focus is observed in each nucleus,  
741 indicating successful pairing between the homologs. Scale bar is 3.2 μm. (E)  
742 Immunofluorescence image of SC components in late pachytene nuclei in a whole-mount gonad  
743 from the *dsb-3(me115)* mutant. Axis protein HTP-3 and SC central region protein SYP-2  
744 colocalize in continuous stretches between chromosome pairs, indicating successful synapsis.  
745 Scale bar is 3.2 μm.

746

747 **Figure 2. DSB-3 is required for meiotic double-strand break formation.** (A) Left:  
748 Immunofluorescence images of RAD-51 foci in early pachytene nuclei in whole-mount gonads.  
749 RAD-51 foci mark sites of processed DSBs and are strongly reduced in the *dsb-3(me115)*  
750 mutant. Right: Quantification of RAD-51 foci in whole-mount gonads (at least three gonads were  
751 scored per genotype). Gonads were divided into seven zones: the premeiotic zone (PM), which



752 includes all nuclei prior to the transition zone (where nuclei enter meiotic prophase), and six  
753 consecutive equal-sized zones encompassing the region of the gonad from the transition zone  
754 to the end of the pachytene stage. (B) Rescue of chiasma formation in *dsb-3* mutants by  $\gamma$ -  
755 irradiation induced DNA breaks. Graph showing the average numbers of DAPI bodies present  
756 in diakinesis-stage oocytes of worms exposed to 5 kRad of  $\gamma$ -irradiation at 20 hours post L4,  
757 and un-irradiated age-matched controls, fixed and stained with DAPI 18-20 hours post  
758 irradiation.

759 **Figure 3. DSB-3 is concentrated in DSB-competent nuclei and is interdependent with**  
760 **DSB-1 and DSB-2.** (A) Immunofluorescence image of a whole-mount hermaphrodite gonad  
761 (from distal tip to end of pachytene) stained with DAPI and antibodies detecting DSB-3::GFP,  
762 DSB-1, and DSB-2. Meiotic progression proceeds from left to right, as in the rest of the images  
763 for this figure. DSB-3::GFP becomes concentrated in germ cell nuclei within the transition zone  
764 (rectangular inset - top, soon after entry into meiotic prophase. The DSB-3 immunofluorescence  
765 signal is strongest in early pachytene nuclei, then declines sharply in mid-pachytene, albeit with  
766 a few outlier nuclei (square inset) in the late pachytene region of the gonad retaining a strong  
767 DSB-3 signal. This pattern of appearance and disappearance of DSB-3 from germ cell nuclei is  
768 similar to the patterns observed for the double-strand break promoting proteins DSB-1 and  
769 DSB-2. (B) Immunofluorescence images of a whole-mount hermaphrodite gonads stained with  
770 DAPI and antibody detecting DSB-3::GFP. DSB-3::GFP signal is not detected in the *dsb-1(null)*  
771 mutant, and is strongly reduced and limited to a smaller region of the gonad in the *dsb-2(null)*  
772 mutant. (C) Immunofluorescence images of gonads stained for DSB-1 (left) or DSB-2(right),  
773 showing that DSB-1 and DSB-2 immunofluorescence signals are not detected in the *dsb-*  
774 *3(me115)* mutant. Scale bars = 16.2  $\mu$ m.

775 **Figure 4. Evidence that DSB-1, DSB-2 and DSB-3 form a complex homologous to the**  
776 **yeast and mammalian REC114-MEI4 complexes.** (A) Left: Schematic diagram depicting the

777 positions of six short signature motifs (SSMs, blue boxes) previously defined for Mei4 homologs  
778 in diverse species, indicating the three SSMs (1, 4 and 6) that are most strongly supported in *C.*  
779 *elegans* DSB-3; gray boxes indicate positions that potentially correspond to SSMs 2, 3 and 5  
780 based on a multiple sequence alignment (MSA) with vertebrate and marine invertebrate  
781 homologs of similar size, but are less well conserved. Right: Aligned sequences of SSMs 1, 4  
782 and 6 from *Mus musculus*, *Homo sapiens*, *Xenopus tropicalis*, *Danio rerio*, *Strongylocentrotus*  
783 *purpuratus*, *Amphimedon queenslandica*, *Aplysia californica* and the following nematodes of the  
784 genus *Caenorhabditis*: *C. nigoni*, *C. briggsae*, *C. sinica*, *C. remanei*, *C. latens*, *C. tropicalis*, *C.*  
785 *elegans*. SSMs are cropped from an MSA generated in JalView (80) using the ClustalX coloring  
786 scheme. For additional information, see Supplemental Figure 2 and Materials and Methods. (B)  
787 Yeast two-hybrid assay revealing protein-protein interactions among the DSB-1, -2, and -3  
788 proteins and between DSB-1 and SPO-11. Potential interactions between proteins fused with  
789 the GAL4 activation domain (AD) and proteins fused with the GAL4 DNA binding domain (BD)  
790 were assayed by growth on media lacking histidine and adenine. A construct producing an N-  
791 terminal truncation of SPO-11 lacking the first 47 amino acids ( $\Delta$ 1-47) was used for these  
792 analyses, as severe auto-activation was observed for full-length SPO-11. Negative controls  
793 showing lack of auto-activation for the constructs used are presented in Supplemental Figure 2.  
794 In addition to experiments using constructs expressing full-length DSB-1, some experiments  
795 used a construct expressing an N-terminally truncated DSB-1 lacking the first 33 amino acids  
796 ( $\Delta$ 1-33). A schematic summarizing the identified interactions is shown on the bottom right.

797

798 **Figure 5. DSB-3, DSB-2, and DSB-1 colocalize in meiotic nuclei.** (A) Schematic  
799 summarizing the object-based image analysis pipeline used to assess colocalization of foci in  
800 SIM immunofluorescence images of partially spread nuclei (see Materials and Methods and  
801 Supplemental Figure 3 for more details). (B) Representative SIM immunofluorescence images

802 of individual spread nuclei stained with antibodies targeting the indicated DSB proteins; each  
803 panel depicts a single Z slice from a 3D image stack. The following experiments are  
804 represented in order from left to right: mouse monoclonal HA and rabbit polyclonal DSB-2  
805 antibodies, both detecting the same 3xHA::DSB-2 tagged protein in a *3xha::dsb-2* II strain;  
806 chicken GFP and rabbit DSB-2 antibodies, detecting DSB-3::GFP and DSB-2 in a *meSi7[dsb-*  
807 *3::gfp]* II; *dsb-3(me115)* IV strain ; mouse HA and rabbit FLAG antibodies, detecting  
808 3xHA::DSB-1 and 3xFLAG::DSB-3 in a *3xflag::dsb-3 3xha::dsb-1* IV strain; and mouse HA and  
809 rabbit DSB-2 antibodies, detecting 3xHA::DSB-1 and DSB-2 in a *3xflag::dsb-3 3xha::dsb-1* IV  
810 strain. Scale bar is 2  $\mu$ m. (C) Quantification of DSB protein foci for the indicated pairwise  
811 combinations; each data point represents the numbers of foci for the two analyzed channels in a  
812 single nucleus. Spearman R values reported indicate that numbers of the two types of foci are  
813 strongly correlated within nuclei. (D) Graphs showing the fraction of foci of a given type  
814 (indicated by a single colored circle in the denominator in each schematic below the horizontal  
815 axis) that are colocalized with the other type of focus analyzed in that same experiment  
816 (colocalizing foci are represented by two colored circles in the numerator). For each pair of  
817 focus types analyzed, two sets of experimental analyses (represented by colored data points)  
818 and paired negative controls (represented by grey data points) are presented.

819

820 **Figure 6. The Presence and Colocalization of DSB-3, DSB-2, and DSB-1 are Not Confined**  
821 **to the Meiotic Chromosomal Axis.** (A) Left: representative maximum-intensity projections of  
822 SIM images, representing the middle third of Z-stacks collected for the depicted spread nuclei.  
823 Nuclei were stained with antibodies targeting DSB proteins and the axis component HTP-3.  
824 Scale bar is 2  $\mu$ m. Right: graph showing quantification of numbers of DSB protein foci that  
825 colocalize with the axis signal, as well as the total numbers of DSB protein foci identified in the  
826 analyzed nuclei. The data indicate that the majority of foci do not colocalize with the axis. (B)

827 Graphs depicting the fractions of Colocalized Foci / Total Foci for DSB protein foci of the  
828 indicated types (represented as in Figure 5), reported for axis-associated foci and for total  
829 nuclear foci analyzed within the same data sets. The filled dots represent colocalization  
830 fractions for all DSB protein foci of a given type within the nucleus, while dots with crosses  
831 represent the colocalization fractions for the subset of DSB protein foci of the indicated type that  
832 colocalize with the axis.

833

834 **Table 1. Quantitation of embryo viability, male frequency and diakinesis karyotypes.**

835 Strains used in and/or created for this study were evaluated for the indicated parameters.  
836 Numbers of DAPI bodies were evaluated for worms fixed and stained at 24 hours post L4 stage.  
837 Analysis of AV913 and corresponding controls were conducted at two temperatures based on  
838 the temperature-sensitive nature of the *dsb-3(me6ts)* mutant.

839 **Supplemental Table 1. Summary of information relevant to the CRISPR/Cas9 edits**

840 **created for this work.** Information includes: a) sequence of the cRNA used in the injection  
841 mixture; b) sequence of the edit created and description of its effect on the gene and encoded  
842 protein; c) sequences of primers used for mutation detection and verification of edits via Sanger  
843 sequencing.

844 **Supplemental Figure 1. Meiotic prophase progression and homolog pairing in the *dsb-***

845 ***3(null)* mutant.** (A) Immunofluorescence images of whole-mount hermaphrodite gonads (from  
846 distal tip to end of pachytene) stained with DAPI and antibodies detecting SUN-1 Ser24 Pi, an  
847 indicator of CHK-2 activity detected from the onset of meiotic prophase through the early  
848 pachytene stage (36, 72). *dsb-3(me115)* mutant germlines shown an extension of this marker  
849 relative to WT, reflecting operation of a crossover assurance checkpoint/surveillance  
850 mechanism that prolongs the early pachytene stage in response to one or more chromosome

851 pairs lacking crossover-competent recombination intermediates (20, 21, 36). (B) Quantification  
852 of homolog pairing assayed by FISH. FISH signals from homologous chromosomes were  
853 considered paired if they were separated by  $\leq 0.7 \mu\text{m}$ . Numbers of nuclei scored for WT: zone  
854 1, n=180; zone 2, n=201; zone 3, n=180; zone 4, n=178; zone 5, n=180; zone 6, n=167.  
855 Numbers of nuclei scored for *dsb-3*: zone 1, n=159; zone 2, n=180; zone 3, n=155; zone 4,  
856 n=160; zone 5, n=143; zone 6, n=117

857

858 **Supplemental Figure 2. Alignment of MEI4 and DSB-3 orthologs, and Y2H controls. (A)**

859 Multiple sequence alignment generated with MAFFT Version 7.0 with the ClustalX coloring  
860 scheme. Protein sequences included in the multiple sequence alignment were from the  
861 following species: Vertebrates: *Mus musculus*, *Homo sapiens*, *Xenopus tropicalis*, *Danio rerio*;  
862 marine invertebrates: *Strongylocentrotus purpuratus*, *Amphimedon queenslandica*, *Aplysia*  
863 *californica*; Nematodes of the genus *Caenorhabditis*: *C. nigoni*, *C. briggsae*, *C. sinica*, *C.*  
864 *remanei*, *C. latens*, *C. tropicalis*, *C. elegans*. The outlined boxes indicate the positions of the  
865 SSMs that were previously defined for MEI4 orthologs from diverse species. Red boxes indicate  
866 cases where the SSM includes at least 5 amino acid residues that are conserved or exhibit  
867 similar electrophysiological properties in at least 85% of the aligned sequences. Gray boxes  
868 indicate cases where these thresholds are not met. (B) Negative controls for yeast two-hybrid  
869 assays, showing lack of auto-activation for cells containing the indicated constructs.

870 **Supplemental Figure 3. 3D Object-Based Colocalization Analysis Pipeline for SIM images**

871 **of DSB protein foci in spread nuclei.** (A) A schematic showing the general pipeline used for  
872 colocalization analyses. ImageJ plugins used were 3D Maxima Finder (75) and the 3D Object  
873 Counter (81). (B) Yellow box indicating protocol used in a subset of our analyses in which  
874 images were additionally segmented to identify DSB protein foci that coincided with the axis  
875 signal; the Otsu method (82) was used in our thresholding process for this segmentation.

876 **Supplemental Figure 4. Cumulative distribution plots for the distances from each**  
877 **Channel 1 DSB protein focus to its nearest neighbor Channel 2 focus.** The x-axis  
878 represents the distances between nearest neighbor foci pairs, and the y-axis indicates the  
879 percentage of measurements at or below the given distance on the x-axis. Experimental data  
880 are depicted in green circles and values for the corresponding negative control rotated images  
881 are indicated with purple squares. (A) The cumulative distribution of distances between  
882 3xHA::DSB-2 mAB foci and nearest neighbor DSB-2 pAB foci. (B) The cumulative distribution  
883 of distances between 3xHA::DSB-1 foci and nearest neighbor 3xFLAG::DSB-3 foci. (C) The  
884 cumulative distribution of distances between 3xHA::DSB-1 foci and nearest neighbor DSB-2  
885 pAB foci. (D) The cumulative distribution of distances between DSB-3::GFP foci and nearest  
886 neighbor DSB-2 pAB foci.

887 **Supplemental Figure 5. Colocalization analysis for DSB-2 and DSB-3::GFP on super-**  
888 **spread nuclei.** Images depict a super-spread nucleus (top) and an inset from the same  
889 nucleus (bottom), showing DAPI-stained DNA and immunofluorescence signals corresponding  
890 to DSB-2, DSB-3::GFP, and axis protein HTP-3. The graph shows the fraction of DSB-2 foci  
891 (magenta) within a given ROI that are colocalized with a DSB-3::GFP focus (green), and vice  
892 versa, together with their paired negative controls (represented by grey data points).

893

#### 894 **Acknowledgments**

895 We are grateful to C. Girard and S. Ramakrishnan for assistance with irradiation experiments  
896 and generation of sequencing libraries, W. Zhang for crosses performed early in the analysis of  
897 the *me6ts* mutant, and David Paul for discussions regarding object-based colocalization  
898 analysis. We acknowledge N. Bhatla for creating the Exon-Intron Graphic Maker ([wormweb.org](http://wormweb.org))  
899 used for Figure 1B. We thank A. Dernburg and V. Jantsch for antibodies and the *Caenorhabditis*

900 Genetics Center (funded by NIH Office of Research Infrastructure Programs P40 OD010440) for  
901 strains. This work was supported by an American Cancer Society Research Professor Award  
902 (RP-15-209-01-DDC) and NIH grants R01GM53804 and R35GM126964 to AMV, by a Blavatnik  
903 Family Foundation Fellowship and a Stanford Mason Case Fellowship to AH, by an FWF Erwin  
904 Schrödinger Fellowship (J-3676) to AW, by a Stanford Graduate Fellowship to KY, by grants  
905 from the Taiwan Ministry of Science and Technology (107-2923-B-002-001-MY4 and MoST  
906 104-2628-B-002-002-MY3) to PC, and by grant 1S10OD01227601 from the NCRR to the  
907 Stanford Cell Sciences Imaging Facility.

908

909

## 910 **References**

- 911 1. S. Keeney, "Spo11 and the Formation of DNA Double-Strand Breaks in Meiosis" in  
912 *Recombination and Meiosis*, Genome Dynamics and Stability., R. Egel, D.-H. Lankenau,  
913 Eds. (Springer Berlin Heidelberg, 2008), pp. 81–123.
- 914 2. S. Keeney, J. Lange, N. Mohibullah, Self-Organization of Meiotic Recombination Initiation:  
915 General Principles and Molecular Pathways. *Annu. Rev. Genet.* **48**, 187–214 (2014).
- 916 3. S. Keeney, C. N. Giroux, N. Kleckner, Meiosis-Specific DNA Double-Strand Breaks Are  
917 Catalyzed by Spo11, a Member of a Widely Conserved Protein Family. *Cell* **88**, 375–384  
918 (1997).
- 919 4. A. Bergerat, *et al.*, An atypical topoisomerase II from archaea with implications for meiotic  
920 recombination. *Nature* **386**, 414–417 (1997).
- 921 5. K. S. McKim, Meiotic Synapsis in the Absence of Recombination. *Science* **279**, 876–878  
922 (1998).
- 923 6. A. F. Dernburg, *et al.*, Meiotic Recombination in *C. elegans* Initiates by a Conserved  
924 Mechanism and Is Dispensable for Homologous Chromosome Synapsis. *Cell* **94**, 387–398  
925 (1998).
- 926 7. T. Robert, *et al.*, The TopoVIB-Like protein family is required for meiotic DNA double-  
927 strand break formation. *Science* **351**, 943–949 (2016).
- 928 8. N. Vrielynck, *et al.*, A DNA topoisomerase VI-like complex initiates meiotic recombination.  
929 *Science* **351**, 939–943 (2016).

- 930 9. C. Claeys Bouuaert, *et al.*, Structural and functional characterization of the Spo11 core  
931 complex. *Nat. Struct. Mol. Biol.* **28**, 92–102 (2021).
- 932 10. T. M. Menees, G. S. Roeder, MEI4, a yeast gene required for meiotic recombination.  
933 *Genetics* **123**, 675–682 (1989).
- 934 11. R. E. Malone, D. L. Pittman, J. J. Nau, Examination of the Intron in the meiosis-specific  
935 recombination gene REC114 in *Saccharomyces*. *Mol. Gen. Genet. MGG* **255**, 410–419  
936 (1997).
- 937 12. S. Tessé, *et al.*, Asy2/Mer2: an evolutionarily conserved mediator of meiotic recombination,  
938 pairing, and global chromosome compaction. *Genes Dev.* **31**, 1880–1893 (2017).
- 939 13. R. Kumar, H.-M. Bourbon, B. de Massy, Functional conservation of Mei4 for meiotic DNA  
940 double-strand break formation from yeasts to mice. *Genes Dev.* **24**, 1266–1280 (2010).
- 941 14. R. Kumar, *et al.*, MEI4 – a central player in the regulation of meiotic DNA double-strand  
942 break formation in the mouse. *J. Cell Sci.* **128**, 1800–1811 (2015).
- 943 15. R. Kumar, *et al.*, Mouse REC114 is essential for meiotic DNA double-strand break  
944 formation and forms a complex with MEI4. *Life Sci. Alliance* **1**, e201800259 (2018).
- 945 16. M. Molnar, *et al.*, Characterization of *rec7*, an early meiotic recombination gene in  
946 *Schizosaccharomyces pombe*. *Genetics* **157**, 519–532 (2001).
- 947 17. S. Bonfils, A. E. Rozalen, G. R. Smith, S. Moreno, C. Martin-Castellanos, Functional  
948 interactions of Rec24, the fission yeast ortholog of mouse Mei4, with the meiotic  
949 recombination-initiation complex. *J. Cell Sci.* **124**, 1328–1338 (2011).
- 950 18. A. De Muyt, *et al.*, A high throughput genetic screen identifies new early meiotic  
951 recombination functions in *Arabidopsis thaliana*. *PLoS Genet.* **5**, e1000654 (2009).
- 952 19. A. Ronceret, M.-P. Doutriaux, I. N. Golubovskaya, W. P. Pawlowski, PHS1 regulates  
953 meiotic recombination and homologous chromosome pairing by controlling the transport of  
954 RAD50 to the nucleus. *Proc. Natl. Acad. Sci. U. S. A.* **106**, 20121–20126 (2009).
- 955 20. S. Rosu, *et al.*, The *C. elegans* DSB-2 Protein Reveals a Regulatory Network that Controls  
956 Competence for Meiotic DSB Formation and Promotes Crossover Assurance. *PLoS*  
957 *Genet.* **9**, e1003674 (2013).
- 958 21. E. L. Stamper, *et al.*, Identification of DSB-1, a Protein Required for Initiation of Meiotic  
959 Recombination in *Caenorhabditis elegans*, Illuminates a Crossover Assurance Checkpoint.  
960 *PLoS Genet.* **9**, e1003679 (2013).
- 961 22. J. Li, G. W. Hooker, G. S. Roeder, *Saccharomyces cerevisiae* Mer2, Mei4 and Rec114  
962 Form a Complex Required for Meiotic Double-Strand Break Formation. *Genetics* **173**,  
963 1969–1981 (2006).
- 964 23. S. Maleki, M. J. Neale, C. Arora, K. A. Henderson, S. Keeney, Interactions between Mei4,  
965 Rec114, and other proteins required for meiotic DNA double-strand break formation in  
966 *Saccharomyces cerevisiae*. *Chromosoma* **116**, 471–486 (2007).



- 967 24. S. Steiner, J. Kohli, K. Ludin, Functional interactions among members of the meiotic  
968 initiation complex in fission yeast. *Curr. Genet.* **56**, 237–249 (2010).
- 969 25. T. Miyoshi, *et al.*, A Central Coupler for Recombination Initiation Linking Chromosome  
970 Architecture to S Phase Checkpoint. *Mol. Cell* **47**, 722–733 (2012).
- 971 26. M. Stanzione, *et al.*, Meiotic DNA break formation requires the unsynapsed chromosome  
972 axis-binding protein IHO1 (CCDC36) in mice. *Nat. Cell Biol.* **18**, 1208–1220 (2016).
- 973 27. C. Claeys Bouuaert, *et al.*, DNA-driven condensation assembles the meiotic DNA break  
974 machinery. *Nature* **592**, 144–149 (2021).
- 975 28. S. Panizza, *et al.*, Spo11-Accessory Proteins Link Double-Strand Break Sites to the  
976 Chromosome Axis in Early Meiotic Recombination. *Cell* **146**, 372–383 (2011).
- 977 29. H. Sasanuma, *et al.*, Cdc7-dependent phosphorylation of Mer2 facilitates initiation of yeast  
978 meiotic recombination. *Genes Dev.* **22**, 398–410 (2008).
- 979 30. J. A. Carballo, *et al.*, Budding Yeast ATM/ATR Control Meiotic Double-Strand Break (DSB)  
980 Levels by Down-Regulating Rec114, an Essential Component of the DSB-machinery.  
981 *PLoS Genet.* **9**, e1003545 (2013).
- 982 31. R. Yokoo, *et al.*, COSA-1 Reveals Robust Homeostasis and Separable Licensing and  
983 Reinforcement Steps Governing Meiotic Crossovers. *Cell* **149**, 75–87 (2012).
- 984 32. C. M. Phillips, *et al.*, HIM-8 Binds to the X Chromosome Pairing Center and Mediates  
985 Chromosome-Specific Meiotic Synapsis. *Cell* **123**, 1051–1063 (2005).
- 986 33. A. J. MacQueen, *et al.*, Chromosome Sites Play Dual Roles to Establish Homologous  
987 Synapsis during Meiosis in *C. elegans*. *Cell* **123**, 1037–1050 (2005).
- 988 34. A. F. Severson, L. Ling, V. van Zuylen, B. J. Meyer, The axial element protein HTP-3  
989 promotes cohesin loading and meiotic axis assembly in *C. elegans* to implement the  
990 meiotic program of chromosome segregation. *Genes Dev.* **23**, 1763–1778 (2009).
- 991 35. M. P. Colaiácovo, *et al.*, Synaptonemal Complex Assembly in *C. elegans* Is Dispensable  
992 for Loading Strand-Exchange Proteins but Critical for Proper Completion of  
993 Recombination. *Dev. Cell* **5**, 463–474 (2003).
- 994 36. A. Woglar, *et al.*, Matefin/SUN-1 Phosphorylation Is Part of a Surveillance Mechanism to  
995 Coordinate Chromosome Synapsis and Recombination with Meiotic Progression and  
996 Chromosome Movement. *PLoS Genet.* **9**, e1003335 (2013).
- 997 37. F. Pâques, J. E. Haber, Multiple pathways of recombination induced by double-strand  
998 breaks in *Saccharomyces cerevisiae*. *Microbiol. Mol. Biol. Rev. MMBR* **63**, 349–404  
999 (1999).
- 1000 38. P. Sung, Catalysis of ATP-dependent homologous DNA pairing and strand exchange by  
1001 yeast RAD51 protein. *Science* **265**, 1241–1243 (1994).

- 1002 39. A. Alpi, P. Pasierbek, A. Gartner, J. Loidl, Genetic and cytological characterization of the  
1003 recombination protein RAD-51 in *Caenorhabditis elegans*. *Chromosoma* **112**, 6–16 (2003).
- 1004 40. H.-M. Bourbon, Comparative genomics supports a deep evolutionary origin for the large,  
1005 four-module transcriptional mediator complex. *Nucleic Acids Res.* **36**, 3993–4008 (2008).
- 1006 41. L. A. Kelley, S. Mezulis, C. M. Yates, M. N. Wass, M. J. E. Sternberg, The Phyre2 web  
1007 portal for protein modeling, prediction and analysis. *Nat. Protoc.* **10**, 845–858 (2015).
- 1008 42. M. Boekhout, *et al.*, REC114 Partner ANKRD31 Controls Number, Timing, and Location of  
1009 Meiotic DNA Breaks. *Mol. Cell* **74**, 1053-1068.e8 (2019).
- 1010 43. C. Arora, K. Kee, S. Maleki, S. Keeney, Antiviral Protein Ski8 Is a Direct Partner of Spo11  
1011 in Meiotic DNA Break Formation, Independent of Its Cytoplasmic Role in RNA Metabolism.  
1012 *Mol. Cell* **13**, 549–559 (2004).
- 1013 44. A. Woglar, A. M. Villeneuve, Dynamic Architecture of DNA Repair Complexes and the  
1014 Synaptonemal Complex at Sites of Meiotic Recombination. *Cell* **173**, 1678-1691.e16  
1015 (2018).
- 1016 45. M. G. L. Gustafsson, Nonlinear structured-illumination microscopy: Wide-field fluorescence  
1017 imaging with theoretically unlimited resolution. *Proc. Natl. Acad. Sci.* **102**, 13081–13086  
1018 (2005).
- 1019 46. A. Woglar, *et al.*, Quantitative cytogenetics reveals molecular stoichiometry and  
1020 longitudinal organization of meiotic chromosome axes and loops. *PLOS Biol.* **18**, e3000817  
1021 (2020).
- 1022 47. F. Couteau, HTP-1 coordinates synaptonemal complex assembly with homolog alignment  
1023 during meiosis in *C. elegans*. *Genes Dev.* **19**, 2744–2756 (2005).
- 1024 48. E. Martinez-Perez, HTP-1-dependent constraints coordinate homolog pairing and synapsis  
1025 and promote chiasma formation during *C. elegans* meiosis. *Genes Dev.* **19**, 2727–2743  
1026 (2005).
- 1027 49. W. Goodyer, *et al.*, HTP-3 Links DSB Formation with Homolog Pairing and Crossing Over  
1028 during *C. elegans* Meiosis. *Dev. Cell* **14**, 263–274 (2008).
- 1029 50. Y. Kim, *et al.*, The chromosome axis controls meiotic events through a hierarchical  
1030 assembly of HORMA domain proteins. *Dev. Cell* **31**, 487–502 (2014).
- 1031 51. T. Kaur, M. V. Rockman, Crossover heterogeneity in the absence of hotspots in  
1032 *Caenorhabditis elegans*. *Genetics* **196**, 137–148 (2014).
- 1033 52. M. R. Bernstein, M. V. Rockman, Fine-Scale Crossover Rate Variation on the  
1034 *Caenorhabditis elegans* X Chromosome. *G3 Bethesda Md* **6**, 1767–1776 (2016).
- 1035 53. F. Baudat, K. Manova, J. P. Yuen, M. Jasin, S. Keeney, Chromosome synapsis defects  
1036 and sexually dimorphic meiotic progression in mice lacking Spo11. *Mol. Cell* **6**, 989–998  
1037 (2000).

- 1038 54. P. J. Romanienko, R. D. Camerini-Otero, The mouse Spo11 gene is required for meiotic  
1039 chromosome synapsis. *Mol. Cell* **6**, 975–987 (2000).
- 1040 55. K. J. Hillers, V. Jantsch, E. Martinez-Perez, J. L. Yanowitz, Meiosis. *WormBook Online*  
1041 *Rev. C Elegans Biol.* **2017**, 1–43 (2017).
- 1042 56. W. J. Swanson, V. D. Vacquier, The rapid evolution of reproductive proteins. *Nat. Rev.*  
1043 *Genet.* **3**, 137–144 (2002).
- 1044 57. A. L. Dapper, B. A. Payseur, Molecular evolution of the meiotic recombination pathway in  
1045 mammals. *Evol. Int. J. Org. Evol.* **73**, 2368–2389 (2019).
- 1046 58. S. Brenner, The genetics of *Caenorhabditis elegans*. *Genetics* **77**, 71–94 (1974).
- 1047 59. C. Frøkjær-Jensen, *et al.*, Single-copy insertion of transgenes in *Caenorhabditis elegans*.  
1048 *Nat. Genet.* **40**, 1375–1383 (2008).
- 1049 60. C. Frøkjær-Jensen, *et al.*, An Abundant Class of Non-coding DNA Can Prevent Stochastic  
1050 Gene Silencing in the *C. elegans* Germline. *Cell* **166**, 343–357 (2016).
- 1051 61. C. Engler, R. Kandzia, S. Marillonnet, A One Pot, One Step, Precision Cloning Method with  
1052 High Throughput Capability. *PLoS ONE* **3**, e3647 (2008).
- 1053 62. A. Paix, A. Folkmann, D. Rasoloson, G. Seydoux, High Efficiency, Homology-Directed  
1054 Genome Editing in *Caenorhabditis elegans* Using CRISPR-Cas9 Ribonucleoprotein  
1055 Complexes. *Genetics* **201**, 47–54 (2015).
- 1056 63. J. A. Arribere, *et al.*, Efficient Marker-Free Recovery of Custom Genetic Modifications with  
1057 CRISPR/Cas9 in *Caenorhabditis elegans*. *Genetics* **198**, 837–846 (2014).
- 1058 64. A. M. Villeneuve, A cis-acting locus that promotes crossing over between X chromosomes  
1059 in *Caenorhabditis elegans*. *Genetics* **136**, 887–902 (1994).
- 1060 65. G. A. Auwera, *et al.*, From FastQ Data to High-Confidence Variant Calls: The Genome  
1061 Analysis Toolkit Best Practices Pipeline. *Curr. Protoc. Bioinforma.* **43** (2013).
- 1062 66. M. A. DePristo, *et al.*, A framework for variation discovery and genotyping using next-  
1063 generation DNA sequencing data. *Nat. Genet.* **43**, 491–498 (2011).
- 1064 67. A. McKenna, *et al.*, The Genome Analysis Toolkit: A MapReduce framework for analyzing  
1065 next-generation DNA sequencing data. *Genome Res.* **20**, 1297–1303 (2010).
- 1066 68. B. Langmead, S. L. Salzberg, Fast gapped-read alignment with Bowtie 2. *Nat. Methods* **9**,  
1067 357–359 (2012).
- 1068 69. P. Cingolani, *et al.*, A program for annotating and predicting the effects of single nucleotide  
1069 polymorphisms, SnpEff: SNPs in the genome of *Drosophila melanogaster* strain w1118;  
1070 iso-2; iso-3. *Fly (Austin)* **6**, 80–92 (2012).
- 1071 70. J. B. Bessler, K. C. Reddy, M. Hayashi, J. Hodgkin, A. M. Villeneuve, A Role for  
1072 *Caenorhabditis elegans* Chromatin-Associated Protein HIM-17 in the Proliferation vs .  
1073 Meiotic Entry Decision. *Genetics* **175**, 2029–2037 (2007).

- 1074 71. F. Gabler, *et al.*, Protein Sequence Analysis Using the MPI Bioinformatics Toolkit. *Curr.*  
1075 *Protoc. Bioinforma.* **72**, e108 (2020).
- 1076 72. A. M. Penkner, *et al.*, Meiotic Chromosome Homology Search Involves Modifications of the  
1077 Nuclear Envelope Protein Matefin/SUN-1. *Cell* **139**, 920–933 (2009).
- 1078 73. D. Pattabiraman, B. Roelens, A. Woglar, A. M. Villeneuve, Meiotic recombination  
1079 modulates the structure and dynamics of the synaptonemal complex during *C. elegans*  
1080 meiosis. *PLOS Genet.* **13**, e1006670 (2017).
- 1081 74. T. Stiernagle, Maintenance of *C. elegans*. *WormBook* (2006)  
1082 <https://doi.org/10.1895/wormbook.1.101.1> (December 20, 2020).
- 1083 75. J. Ollion, J. Cochenec, F. Loll, C. Escudé, T. Boudier, TANGO: a generic tool for high-  
1084 throughput 3D image analysis for studying nuclear organization. *Bioinformatics* **29**, 1840–  
1085 1841 (2013).
- 1086 76. S. Preibisch, S. Saalfeld, P. Tomancak, Globally optimal stitching of tiled 3D microscopic  
1087 image acquisitions. *Bioinforma. Oxf. Engl.* **25**, 1463–1465 (2009).
- 1088 77. C. T. Rueden, *et al.*, ImageJ2: ImageJ for the next generation of scientific image data.  
1089 *BMC Bioinformatics* **18**, 529 (2017).
- 1090 78. C. A. Schneider, W. S. Rasband, K. W. Eliceiri, NIH Image to ImageJ: 25 years of image  
1091 analysis. *Nat. Methods* **9**, 671–675 (2012).
- 1092 79. J. Schindelin, *et al.*, Fiji: an open-source platform for biological-image analysis. *Nat.*  
1093 *Methods* **9**, 676–682 (2012).
- 1094 80. A. M. Waterhouse, J. B. Procter, D. M. A. Martin, M. Clamp, G. J. Barton, Jalview Version  
1095 2--a multiple sequence alignment editor and analysis workbench. *Bioinforma. Oxf. Engl.*  
1096 **25**, 1189–1191 (2009).
- 1097 81. S. Bolte, F. P. Cordelières, A guided tour into subcellular colocalization analysis in light  
1098 microscopy. *J. Microsc.* **224**, 213–232 (2006).
- 1099 82. N. Otsu, A Threshold Selection Method from Gray-Level Histograms. *IEEE Trans. Syst.*  
1100 *Man Cybern.* **9**, 62–66 (1979).
- 1101

| Strain | Genotype                                                                 | Incubated Temperature | Average Brood Size $\pm$ SD (number of broods) | Percent Dead Eggs | Percent Males | Average DAPI Bodies/Nucleus $\pm$ SD (number of oocytes) |                     |
|--------|--------------------------------------------------------------------------|-----------------------|------------------------------------------------|-------------------|---------------|----------------------------------------------------------|---------------------|
|        |                                                                          |                       |                                                |                   |               | 24 h post L4                                             | 48 h post L4        |
| N2     | WT                                                                       | 20°                   | 264 $\pm$ 27 (7)                               | 0.4               | 0             | 6.0 $\pm$ 0.2 (92)                                       | 5.9 $\pm$ 0.3 (102) |
| N2     | WT                                                                       | 25°                   | 291 $\pm$ 22 (7)                               | 2                 | 0             | 5.9 $\pm$ 0.3 (110)                                      | 5.9 $\pm$ 0.4 (99)  |
| AV913  | <i>dsb-3(me6ts)</i> IV                                                   | 20°                   | 274 $\pm$ 27 (7)                               | 0.1               | 0             | 6.0 $\pm$ 0.2 (144)                                      | 5.9 $\pm$ 0.3 (111) |
| AV913  | <i>dsb-3(me6ts)</i> IV                                                   | 25°                   | 198 $\pm$ 47 (7)                               | 28.2              | 17.3          | 7.0 $\pm$ 1.4 (108)                                      | 9.9 $\pm$ 1.3 (99)  |
| AV1095 | <i>dsb-3(me115)</i> IV                                                   | 20°                   | 156 $\pm$ 77 (16)                              | 99.4              | 24.9          | 11.6 $\pm$ 0.6 (150)                                     |                     |
| AV1029 | <i>meSi7[sun1p::dsb-3::gfp::sun1 3'UTR unc-119+] II; dsb-3(me115)</i> IV | 20°                   | 150 $\pm$ 23 (8)                               | 5                 | 3.7           | 6.1 $\pm$ 0.4 (207)                                      |                     |
| AV1102 | <i>dsb-3(me125)[3xflag::dsb-3] dsb-1(me124)[3xha::dsb-1]</i> IV          | 20°                   | 243 $\pm$ 34 (7)                               | 2.1               | 2.5           | 6.0 $\pm$ 0.2 (213)                                      |                     |
| AV1115 | <i>dsb-2(me132)[3xha::dsb-2]</i> II                                      | 20°                   | 193 $\pm$ 61 (8)                               | 2.2               | 0.5           | 6.0 $\pm$ 0.2 (150)                                      |                     |

### ***dsb-1(me124) [3xha::dsb-1] IV***

crRNA CACUGGAGUGUCUGCAAUUC  
Edit ATGtatccatacgatgtcccagattacgcttaccatgatgacgttccagactatgcctatccatacgatgtccca  
gattacgctTTTCCTGAGTT**ACAACGCTTCAATG**  
Description Insertion of 3 N-terminal HA tags underlined and silent mutations introduced to  
the guide in bold.  
Primers TGTGAATCATTGCTCCCAAG, CCGTCAGCTTCCTGCTATTC

### ***dsb-3(me125) [3xflag::dsb-3] IV***

crRNA GAUCGAAAUUACCGAUGAUG  
Edit ATGgattataaagacgatgacgataagcgtgactacaaggacgacgacgacaagcgtgattacaaggat  
gacgatgacaagATCGAAATTACCGATGATGA**AG**  
Description Insertion of 3 N-terminal FLAG tags underlined and a silent PAM mutation in  
bold.  
Primers TTTTCCCGAAACACGATTCT, TTCGGAGTTACGACATCTGC

### ***dsb-3(me115) IV***

crRNA GAUCGAAAUUACCGAUGAUG  
Edit ATGATCGAAATTACCGATGATGAGGACTG***ATTCCGGTCTCTGACTGACTGA***  
***ACTGC***~~GTGTCTTAGCGTTTT~~  
Description *Leu9X* in bold: Insertion of a BsaI restriction site in italics; STOP codons in +1,  
+2, +3 frame underlined; and a silent PAM mutation in strikethrough.  
Primers ACACACGCCATCAAGAAAAGCA, TGTGAAGGAAACCGAGTTCCC

### ***dsb-2(me132) [3xha::dsb-2] IV***

crRNA UGUAGUACAUCUCAACUUUC  
Edit ATGtatccatacgatgtcccagattacgcttaccatgatgacgttccagactatgcctatccatacgatgtccca  
gattacgctAGTG**CACGTGGACT**  
Description Insertion of 3 N-terminal HA tags underlined and silent PAM mutation in bold.  
Primers TGAAGGGACCTGCGCGATGTTT, ATTGCGGTGTCCAGCAGGCATC

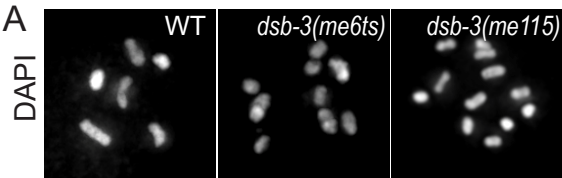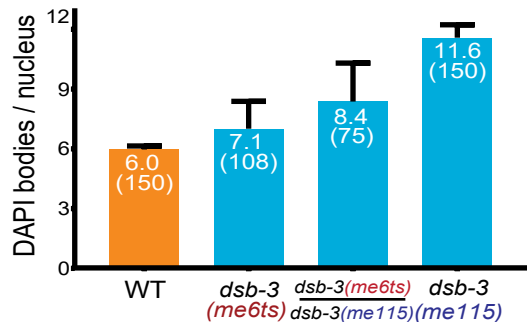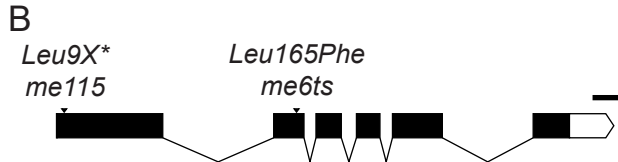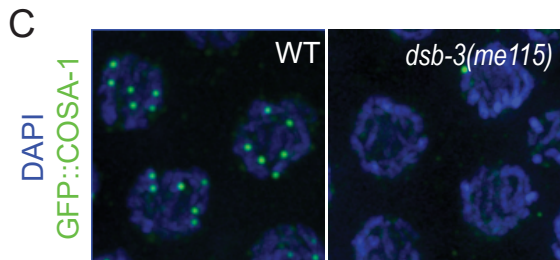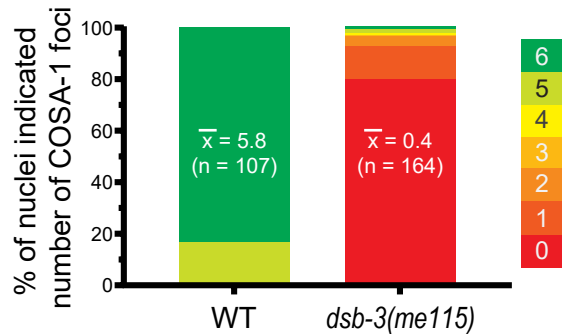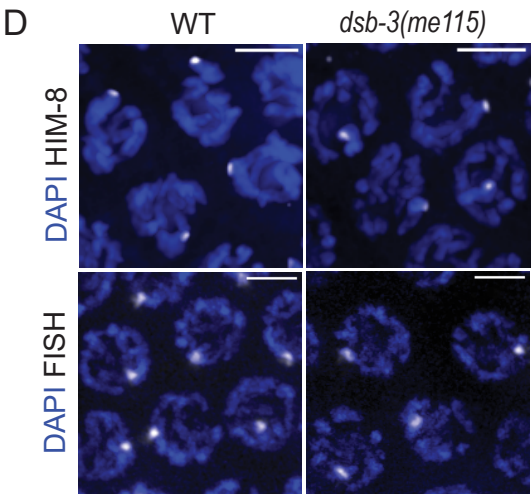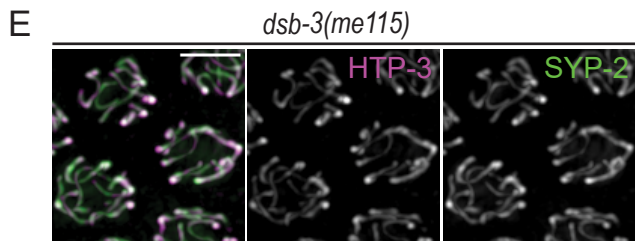

A

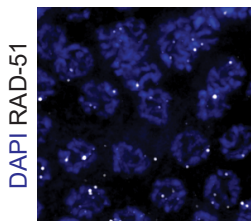

WT

0 1 2 3-5 6-9 >9

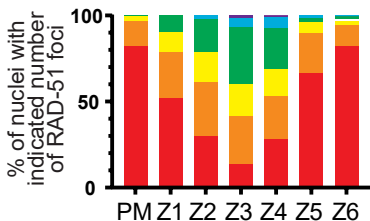*dsb-3(me115)*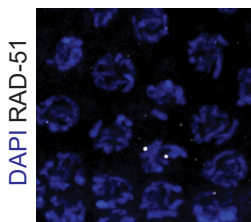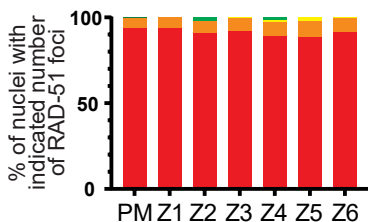

B

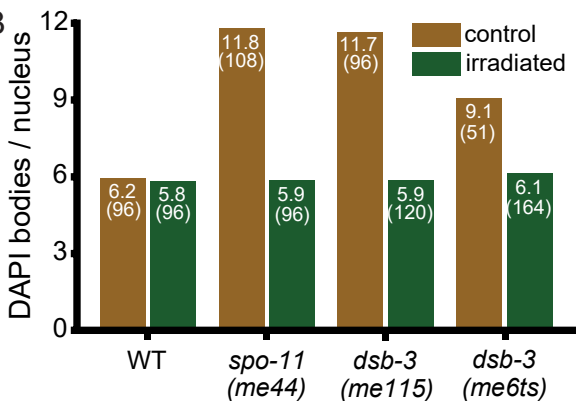



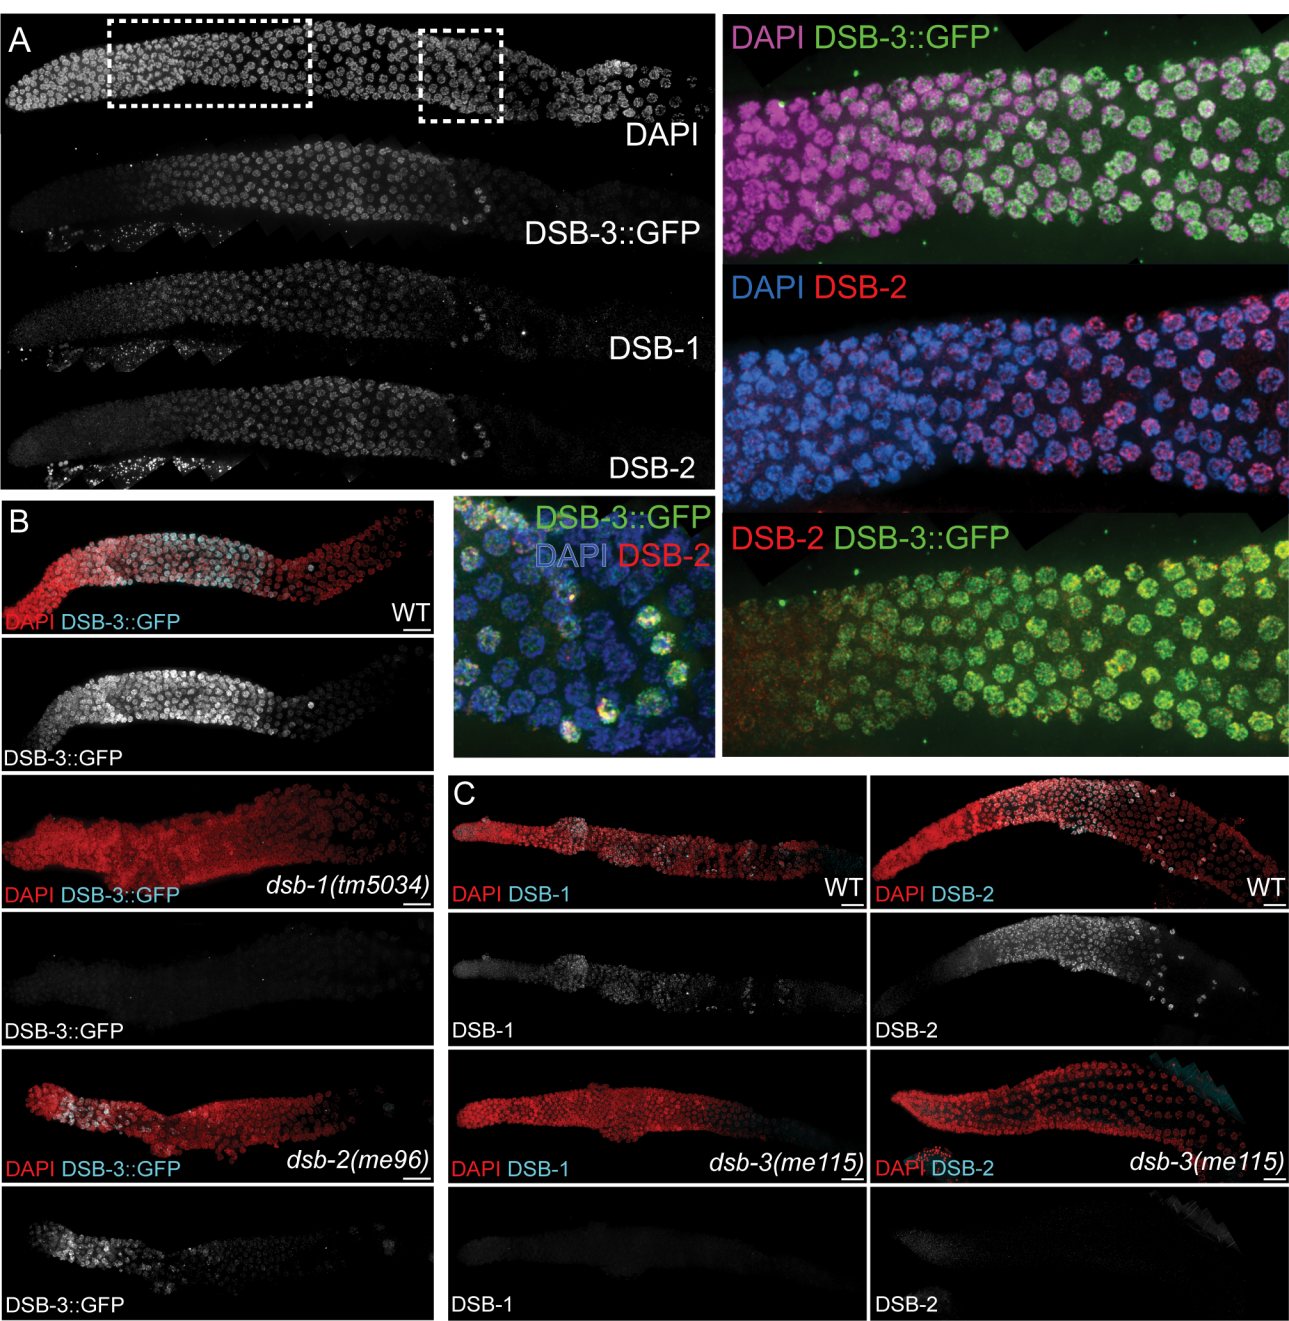

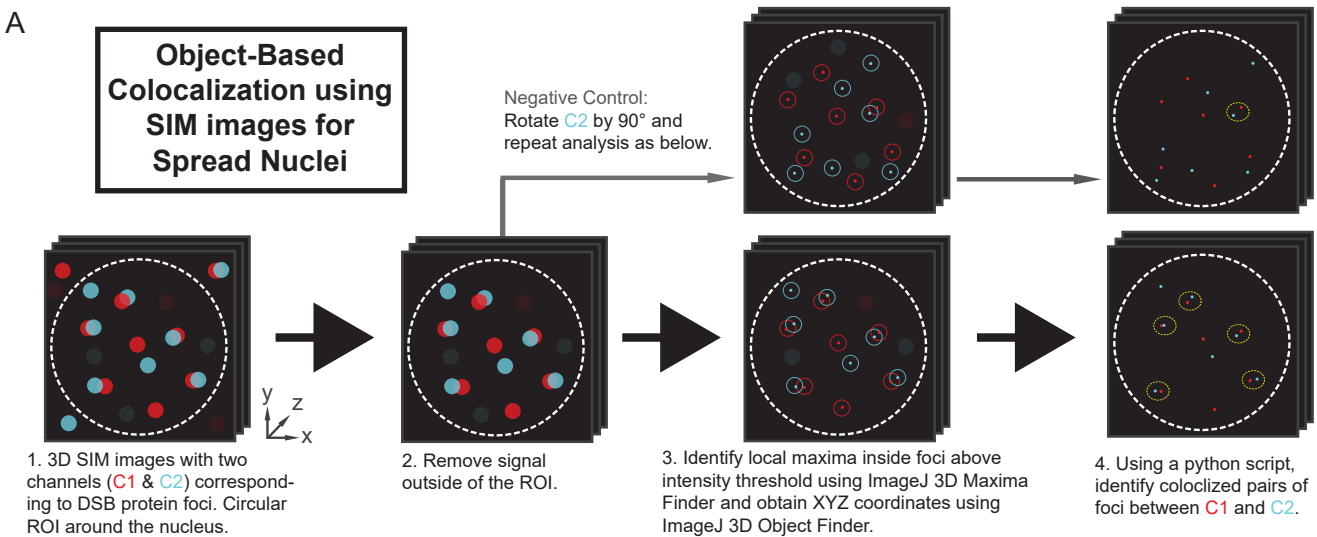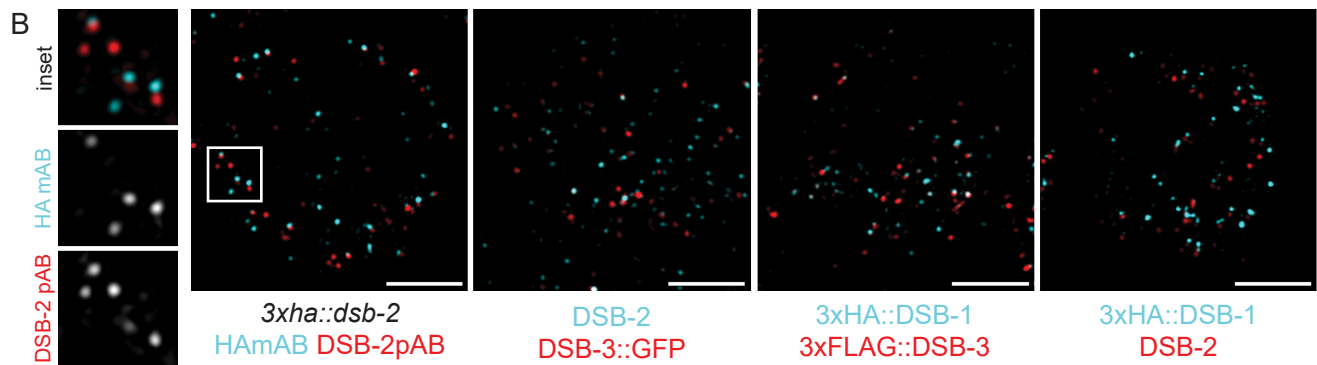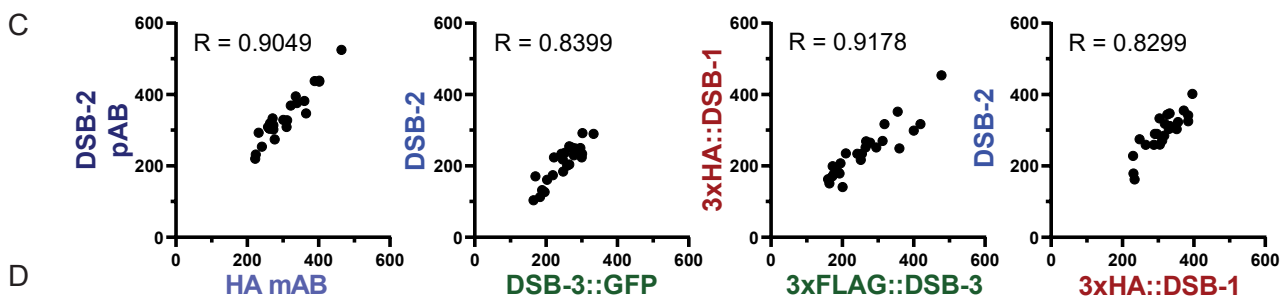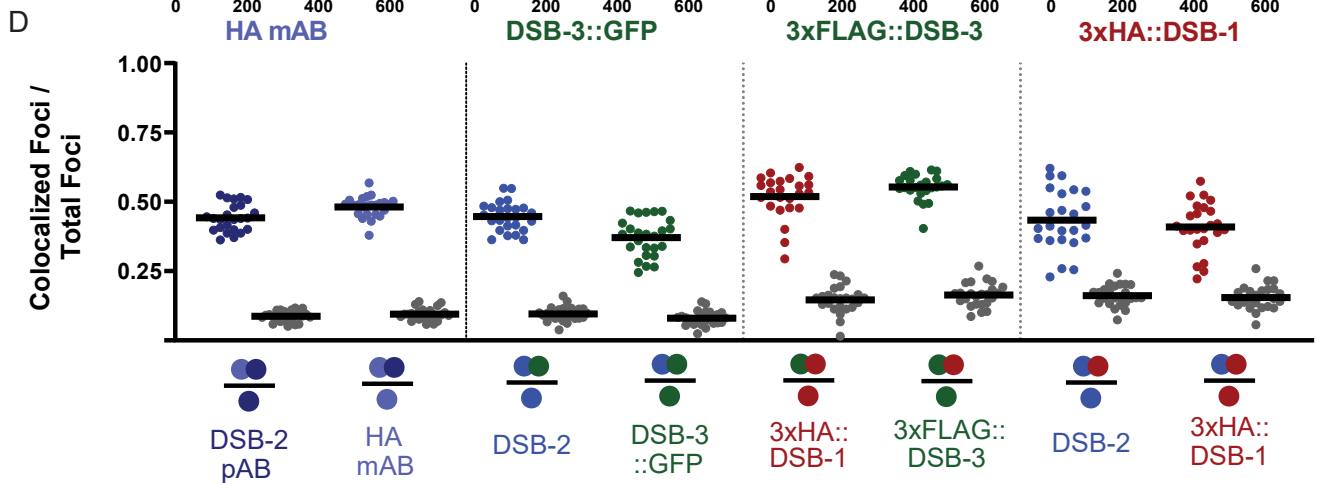

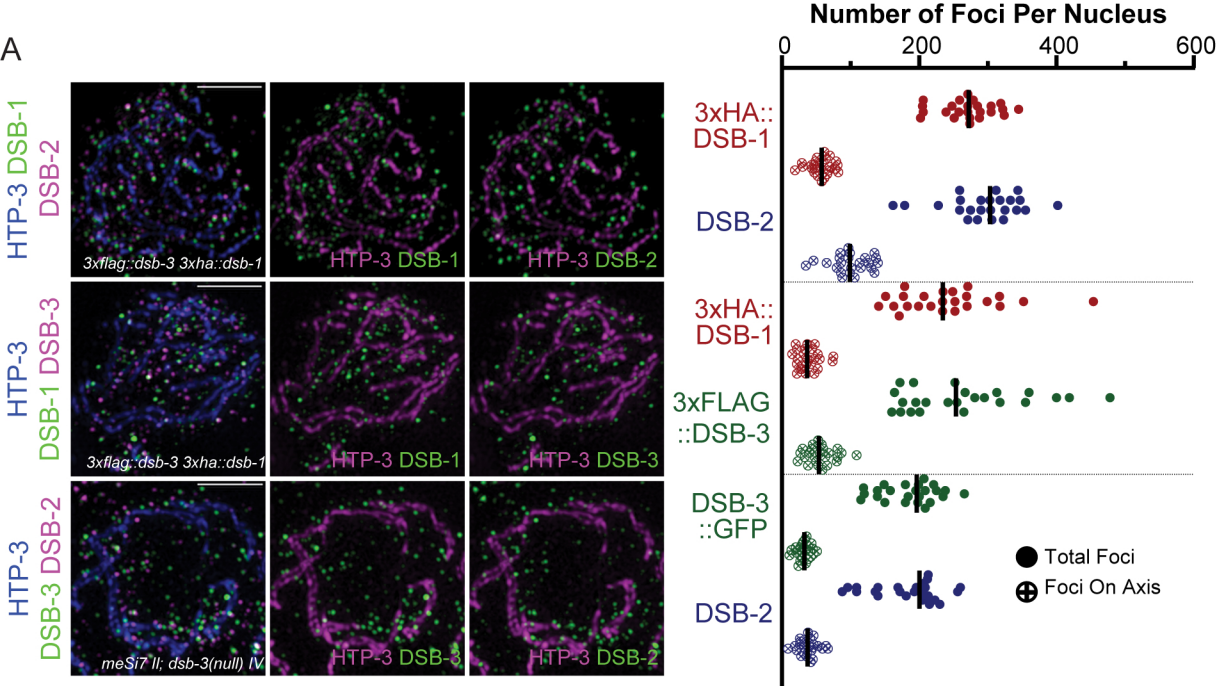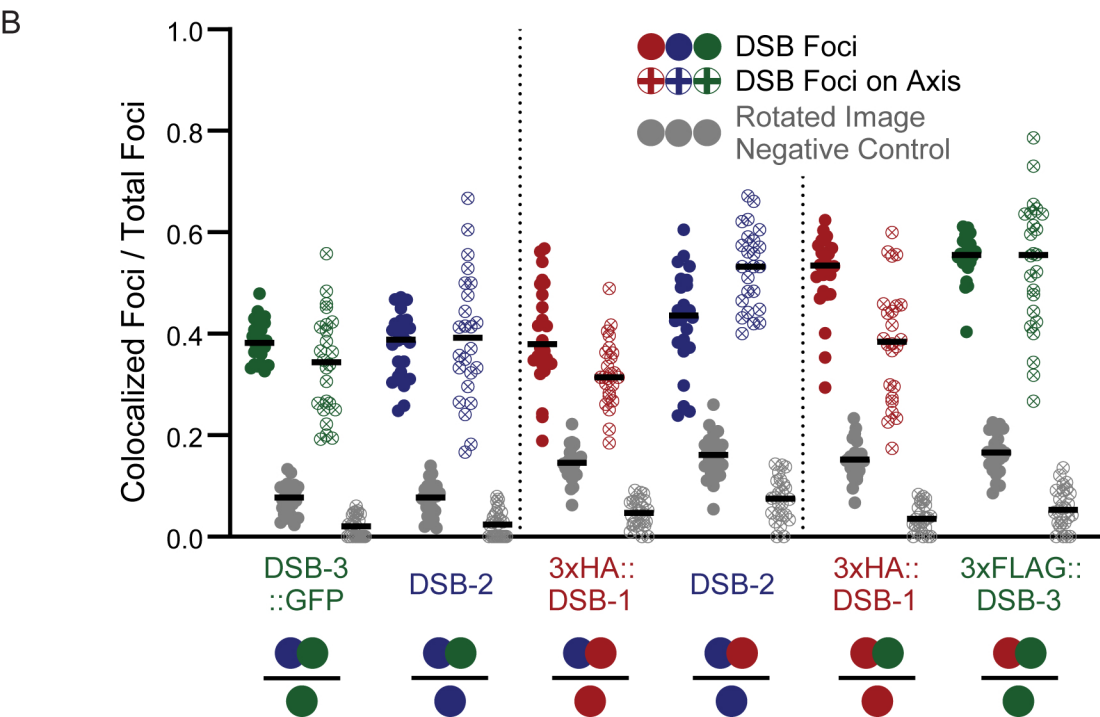

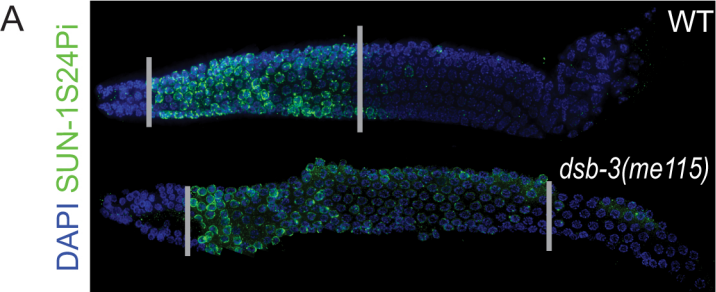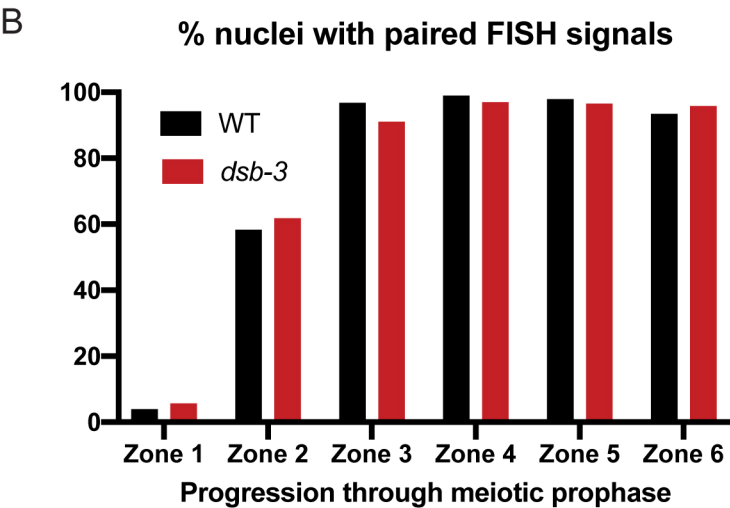

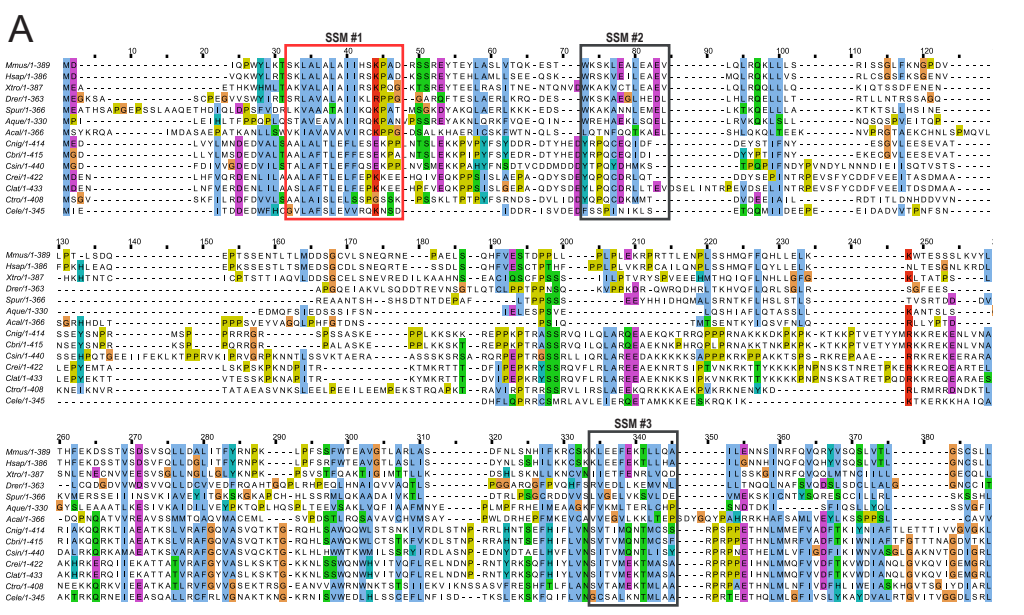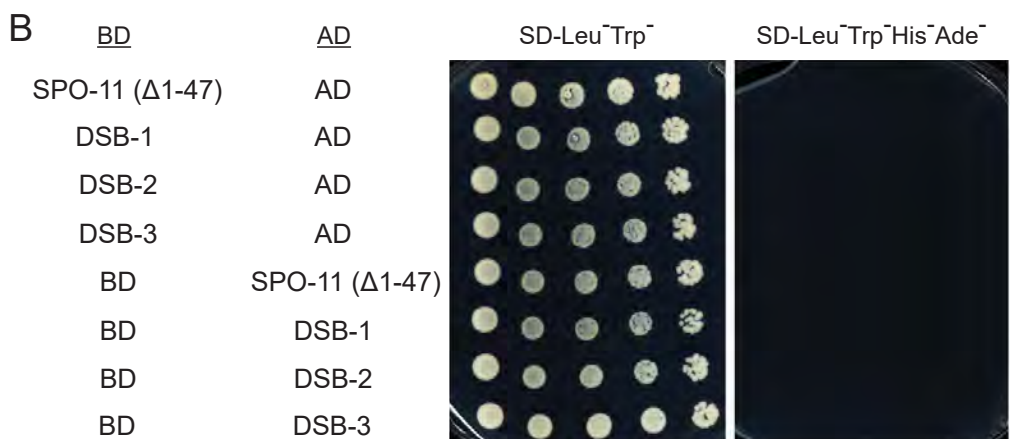

A

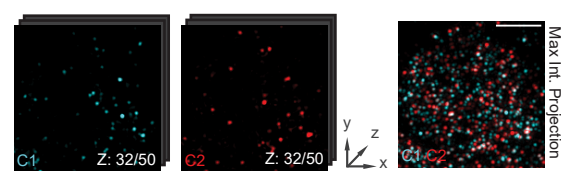

1. For each nucleus analyzed, a 3D Z-Stack SIM image, with two channels (**C1** & **C2**) corresponding to DSB protein foci, was imported into ImageJ.

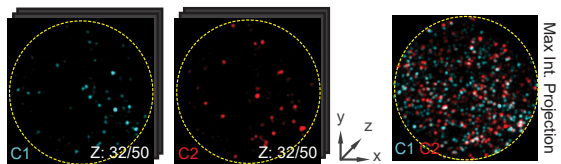

2. Circular ROI was drawn around the nucleus, signal outside of the ROI was cleared, and image was converted to 8-bit.

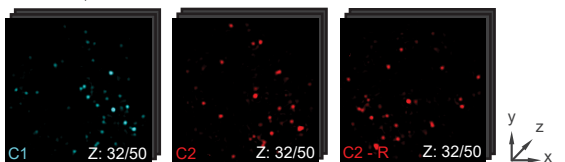

3. A duplicate **C2** window was created and image was rotated by 90 degrees in XY to create a negative control image stack (**C2-R**) to be analyzed in conjunction with unmodified **C1**.

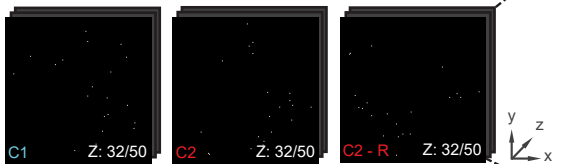

4. 3D Maxima Finder of the 3D ImageJ Suite v3.03 was used to identify local maxima within the foci in the image stack. Note in example above, the local maxima may be located in a Z-slice above or below the depicted slice.

5. 3D Object Counter v2.0 was used to extract the XYZ coordinates of the identified maxima (threshold was set to the minimum of 1 as background thresholding was addressed at a prior step). These XYZ coordinates were saved, and for each **C1** focus, a custom python script was used to calculate the XY and Z distances to the nearest neighboring **C2** focus (and vice versa). Negative controls distances were similarly calculated for **C1** and **C2-R**. The script then reports the numbers and identities of C1 foci considered to be colocalized with C2 (or C2-R foci), or vice versa, based on a defined colocalization distance threshold.

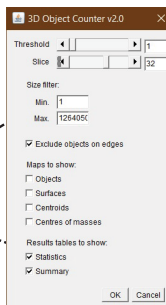

B

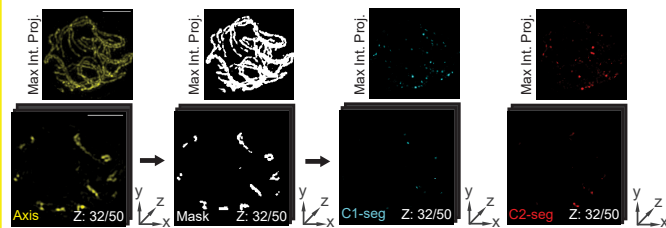

A subset of our analyses also segmented **C1** or **C2** signals depending on whether they coincided with a meiotic axis signal. To accomplish this, we took the 3D Z-stack of SIM images of axis fluorescence and thresholded them (ImageJ>Image>Adjust>Threshold) using the Otsu algorithm, stack histogram setting, and black background parameters enabled. We then adjusted the resulting mask for image calculations (ImageJ>Process>Math [Divide...255]), so that pixels within the mask were assigned a value of 1 and pixels outside the mask had a value of 0. We then used the image calculator to multiply each channel (**C1** or **C2**) with the mask/background values (ImageJ>Process>Image Calculator) to identify foci that had pixels that were included within the mask..

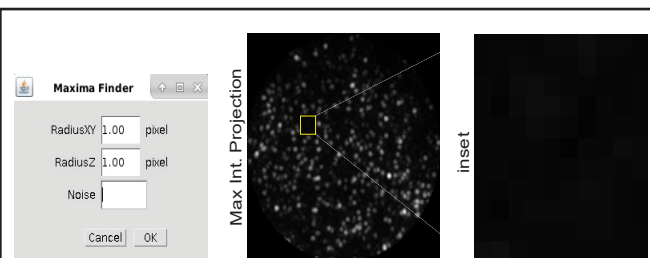

Parameters for 3D Maxima Finder: Radius XY and Radius Z were set to the minimum value of 1.00 pixel. The noise threshold was established by measuring the background fluorescence (in a maximum intensity projection) within an ROI, located inside the nucleus, that lacked any visible signal discernible as a focus. The maximum intensity measured within such an ROI was used as the noise parameter.

XY distance between **C1** and **C2** foci maxima

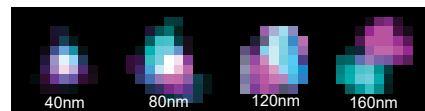

The custom python script compares the XYZ coordinates of foci detected in two channels from the output statistics of 3D Object Counter. It calculates the distances between nearest neighbor foci from these two channels and flags all combinations with a distance below a defined threshold that indicates colocalization. In our analysis, we used 120nm as the XY distance threshold and 340nm as the Z distance threshold to indicate colocalization; these are the reported resolution limits of the DeltaVision OMX Blaze SIM microscopy system used in our study. These XY threshold values were corroborated independently through unsupervised empirical scoring of foci pairs as colocalized/not colocalized based on visual inspection of projected images (example above).

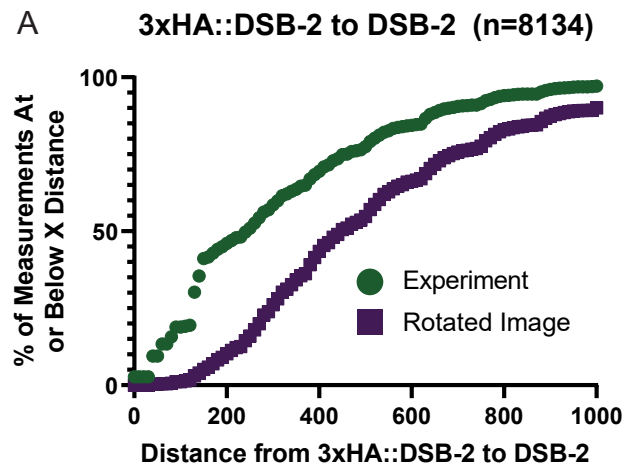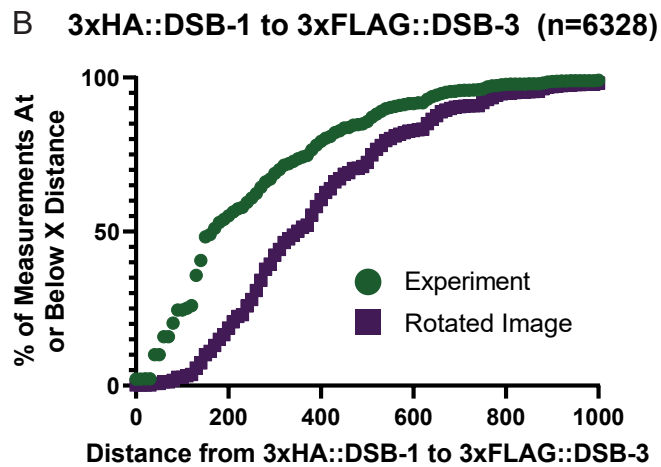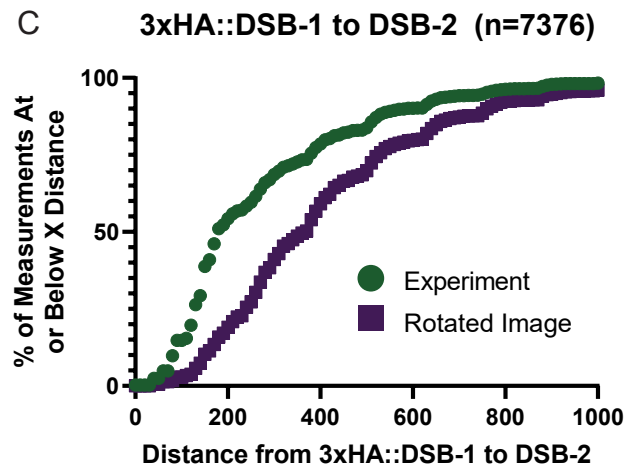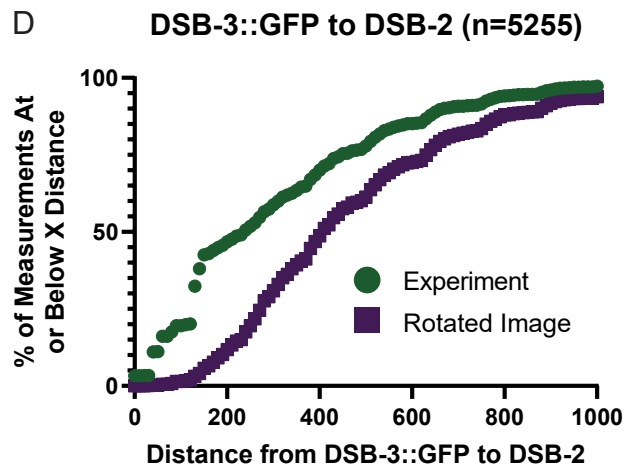

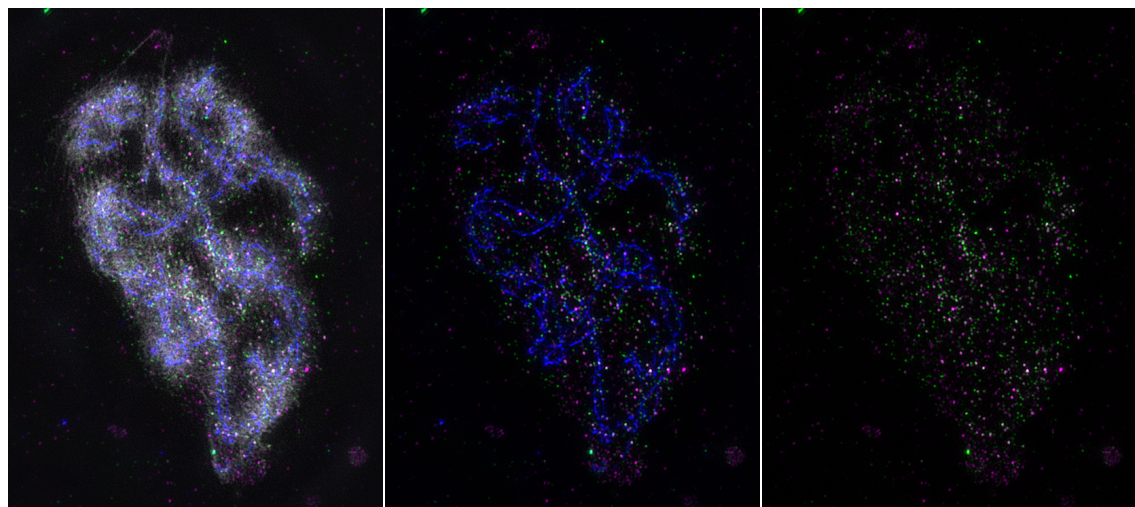

DAPI     DSB-3::GFP  
 HTP-3   DSB-2

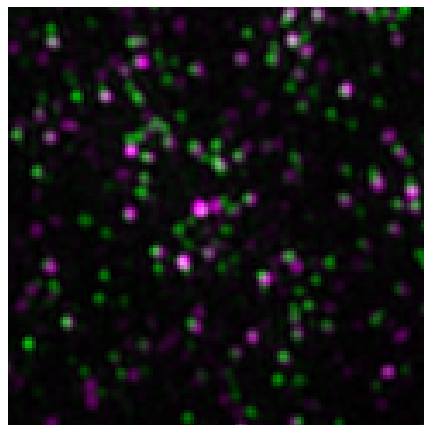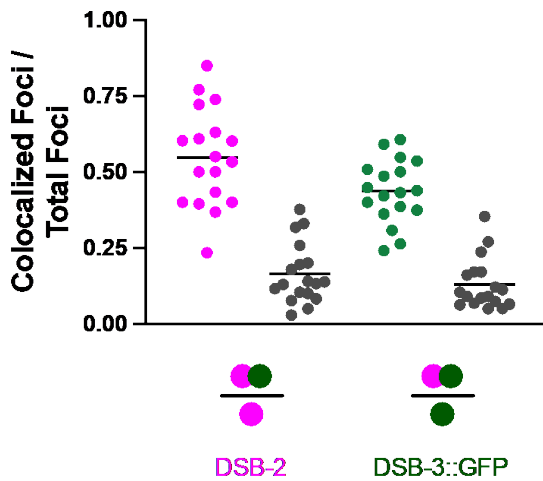

Source: http://biorxiv.org/content/10.1101/2021.05.14.444243v1.full.pdf
